# Supplementary material
Source: MDPI journal article supplement (https://www.mdpi.com/2624-8549/5/4/171)
Supplement: s1 [file s1]

## Supporting Information

# Bioactive Pyrrolo[2,1-f ][1,2,4]triazines: Synthesis, Molecular Docking, In Vitro Cytotoxicity Assay and Antiviral Studies

Nataliya N. Mochulskaya <sup>1</sup>, Svetlana K. Kotovskaya <sup>1</sup>, Ilya I. Butorin <sup>1</sup>, Mikhail V. Varaksin <sup>1</sup>, \*, Valery N. Charushin <sup>1</sup>, Vladimir L. Rusinov <sup>1</sup>, Yana L. Esaulkova <sup>2</sup>, Alexander V. Slita <sup>2</sup>, Polina A. Ilyina <sup>2</sup> and Vladimir V. Zarubaev <sup>2</sup>

<sup>1</sup> Department of Organic and Biomolecular Chemistry, Ural Federal University Named after the First President of Russia B.N. Yeltsin, Mira Street, 19, Yekaterinburg 620002, Russia; n.n.mochulskaya@urfu.ru (N.N.M.)

<sup>2</sup> Saint-Petersburg Pasteur Institute, Mira Street, 14, Saint Petersburg 197101, Russia

\* Correspondence: Correspondence: m.v.varaksin@urfu.ru

### Table of contents

|                                                                                                   |     |
|---------------------------------------------------------------------------------------------------|-----|
| Spectra of 3,5-disubstituted 1,2,4-triazines.....                                                 | S2  |
| Spectra of 1,2,4-triazin-1-ium tetrafluoroborates .....                                           | S5  |
| Spectra of dimethyl 7-methyl-4-phenyl-2-p-tolylpyrrolo[2,1-f][1,2,4]triazine-5,6-dicarboxylate... | S13 |

**Spectrum of 5-(3,4-dimethylphenyl)-3-phenyl-1,2,4-triazine (6e).**

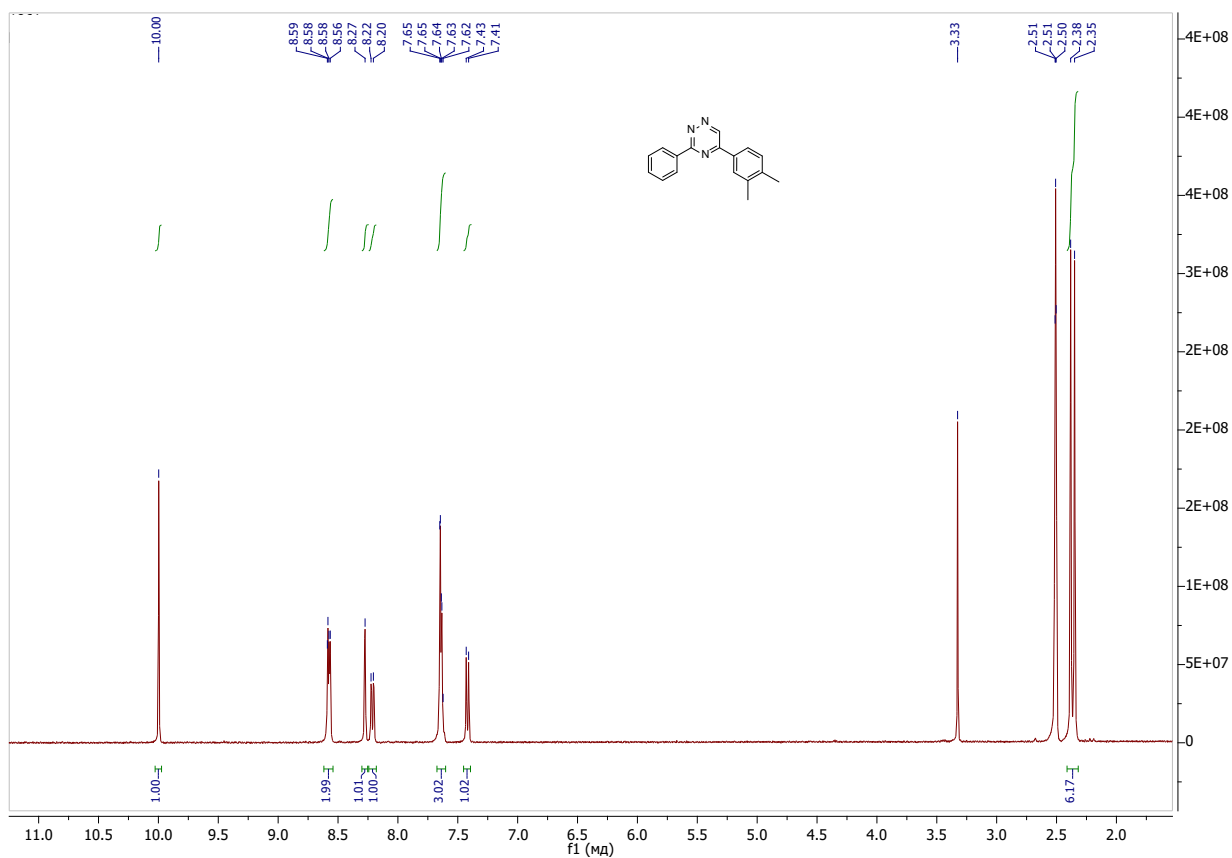

**Figure S1. <sup>1</sup>H NMR (400 MHz, DMSO-*d*<sub>6</sub>) spectra of 6e**

**Spectrum of 3-phenyl-5-(thiophen-2-yl)-1,2,4-triazine (6h).**

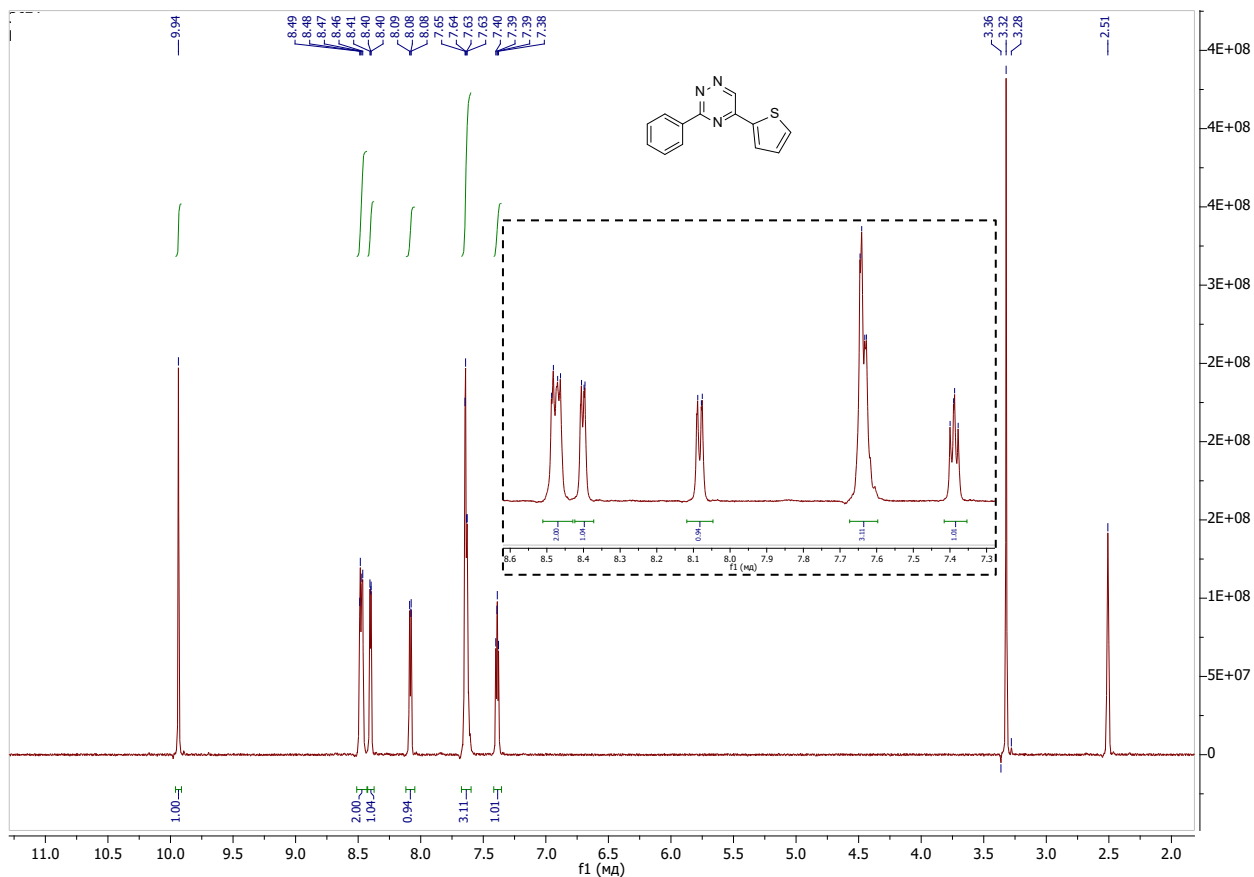

**Figure S2. <sup>1</sup>H NMR (400 MHz, DMSO-*d*<sub>6</sub>) spectra of 6h**

Spectrum of 5-(3,4-dimethylphenyl)-3-(*p*-tolyl)-1,2,4-triazine (7e).

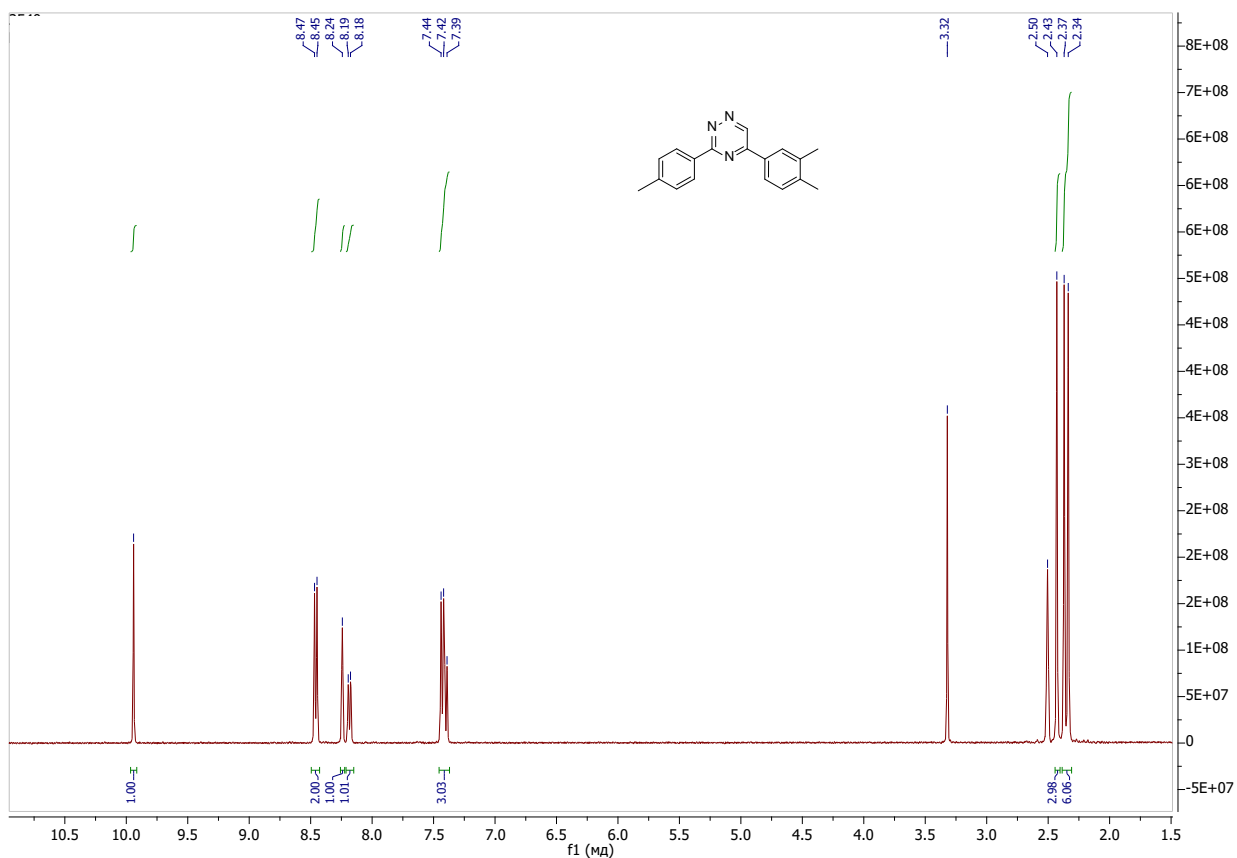

Figure S3.  $^1\text{H}$  NMR (400 MHz,  $\text{DMSO}-d_6$ ) spectra of 7e

Spectrum of 5-(4-methoxyphenyl)-3-(*p*-tolyl)-1,2,4-triazine (7f).

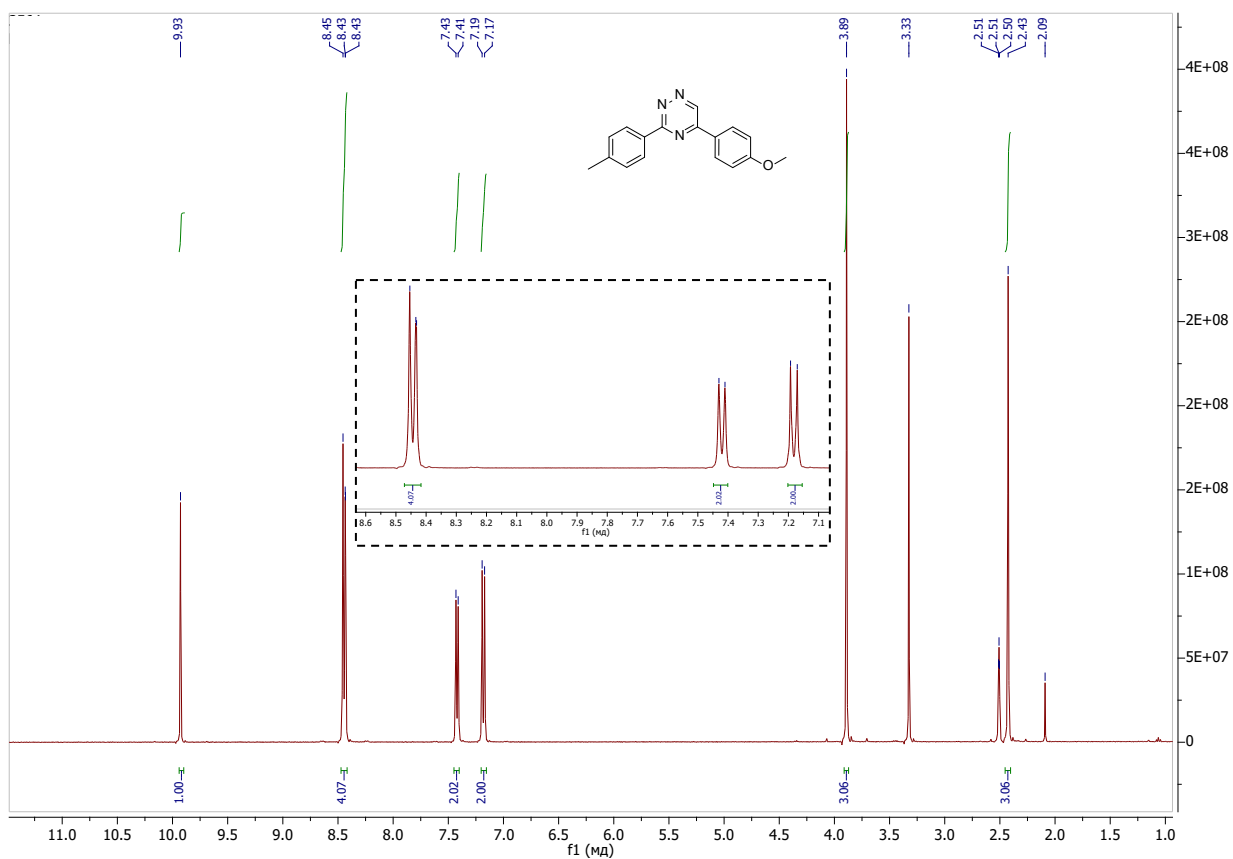

Figure S4.  $^1\text{H}$  NMR (400 MHz,  $\text{DMSO}-d_6$ ) spectra of 7f

Spectrum of 3,5-di(thiophen-2-yl)-1,2,4-triazine (8h).

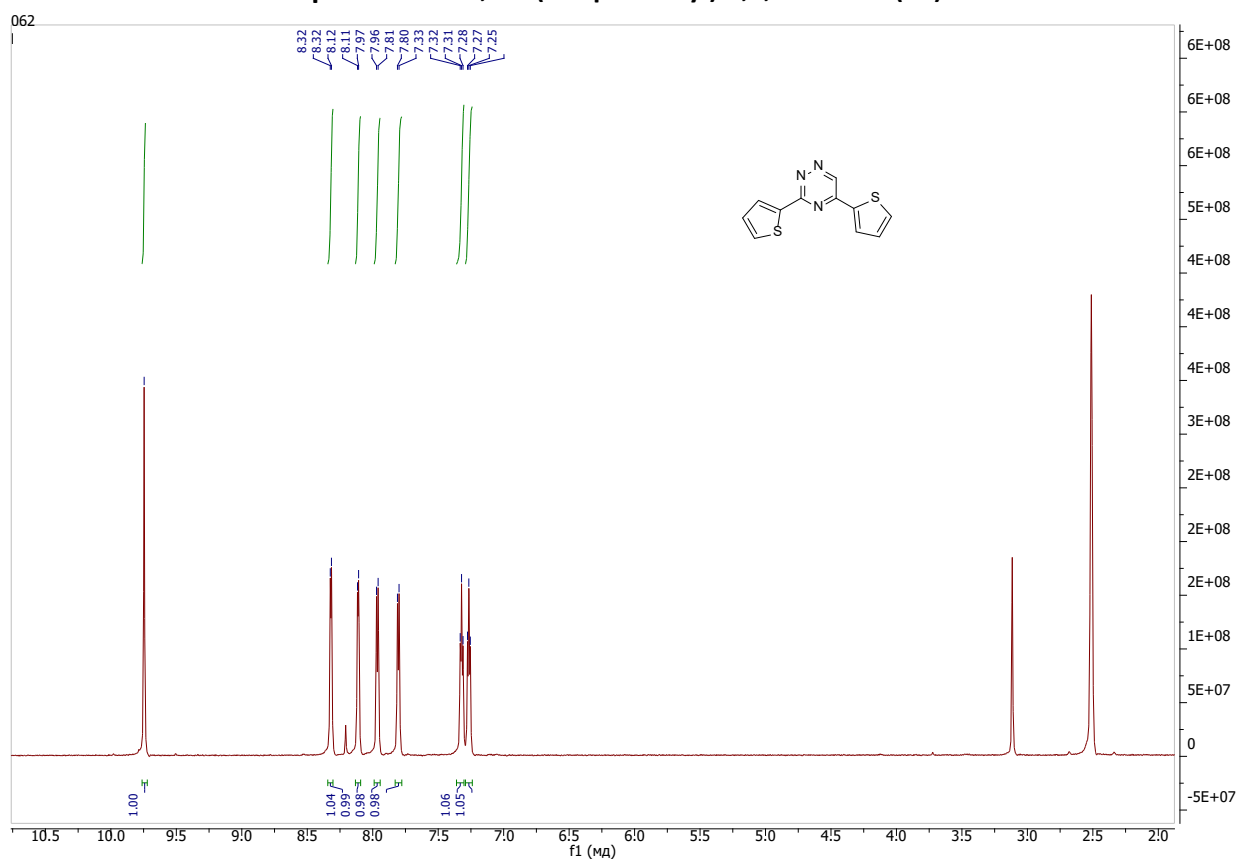

Figure S5. <sup>1</sup>H NMR (400 MHz, DMSO-*d*<sub>6</sub>) spectra of 8h

**Spectrum of 1-ethyl-3,5-diphenyl-1,2,4-triazin-1-ium tetrafluoroborate (10a).**

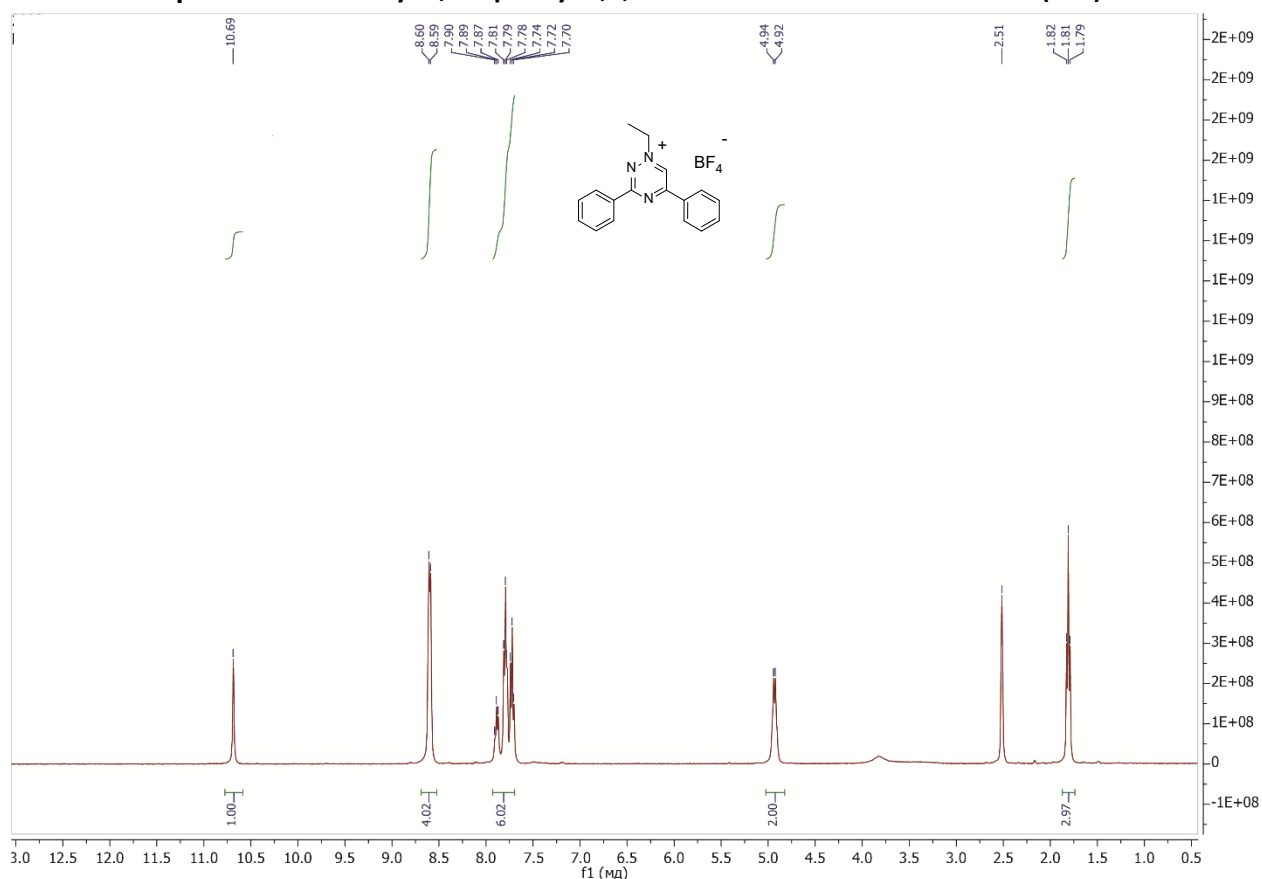

**Figure S6.  $^1\text{H}$  NMR (400 MHz,  $\text{DMSO}-d_6$ ) spectra of 10a**

**Spectrum of 1-ethyl-3-phenyl-5-(*p*-tolyl)-1,2,4-triazin-1-ium tetrafluoroborate (10d).**

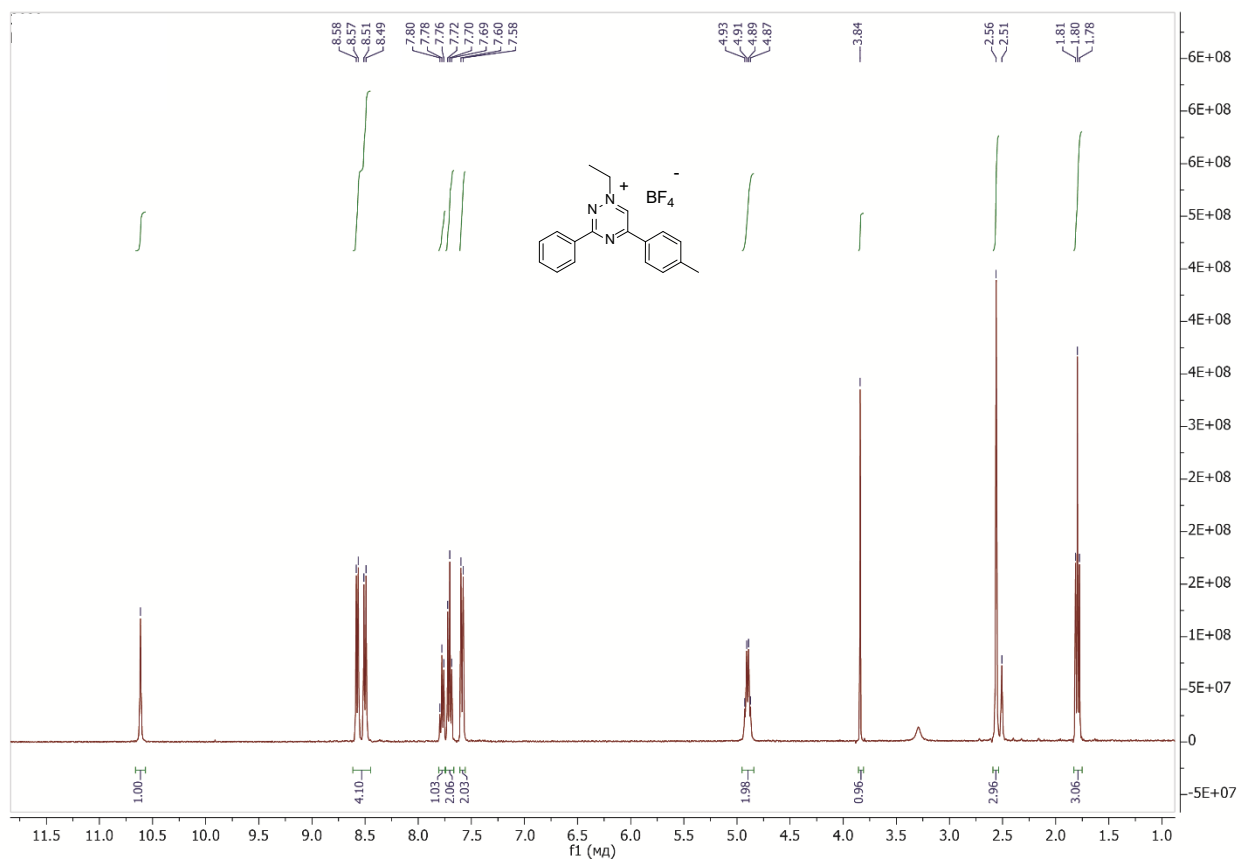

**Figure S7.  $^1\text{H}$  NMR (400 MHz,  $\text{DMSO}-d_6$ ) spectra of 10d**

Spectrum of 5-(3,4-dimethylphenyl)-1-ethyl-3-phenyl-1,2,4-triazin-1-ium tetrafluoroborate (**10e**).

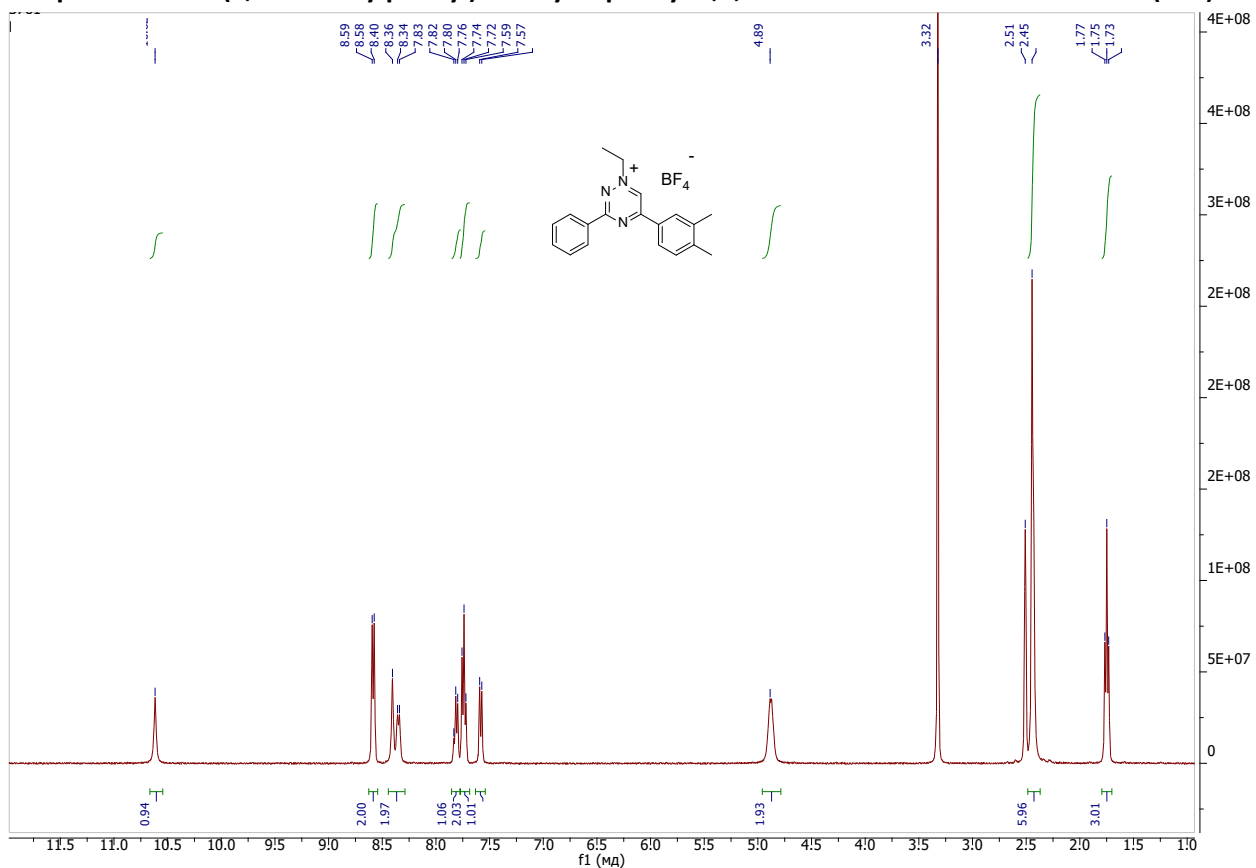

Figure S8.  $^1\text{H}$  NMR (400 MHz,  $\text{DMSO}-d_6$ ) spectra of **10e**

Spectrum of 1-ethyl-5-(4-methoxyphenyl)-3-phenyl-1,2,4-triazin-1-ium tetrafluoroborate (**10f**).

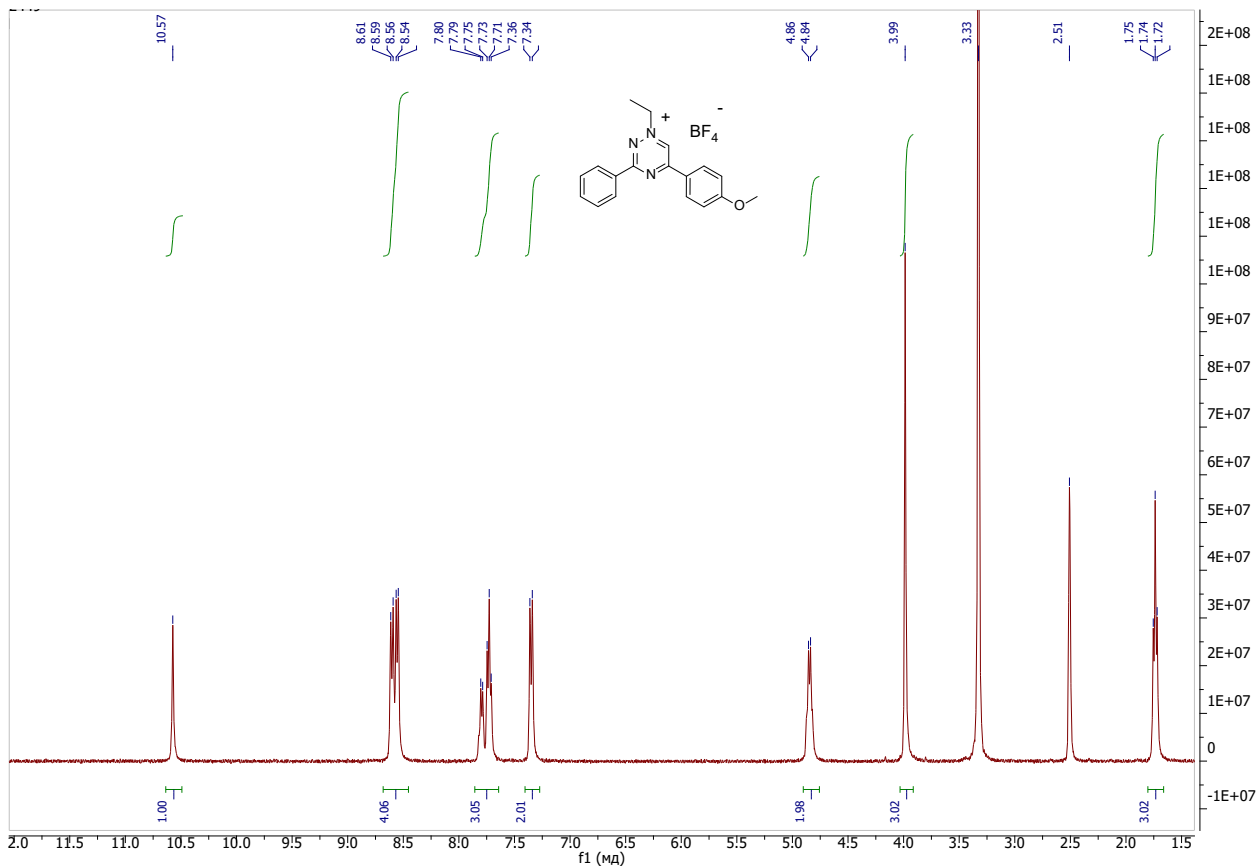

Figure S9.  $^1\text{H}$  NMR (400 MHz,  $\text{DMSO}-d_6$ ) spectra of **10f**

**Spectrum of 1-ethyl-5-(naphthalen-2-yl)-3-phenyl-1,2,4-triazin-1-ium tetrafluoroborate (10g).**

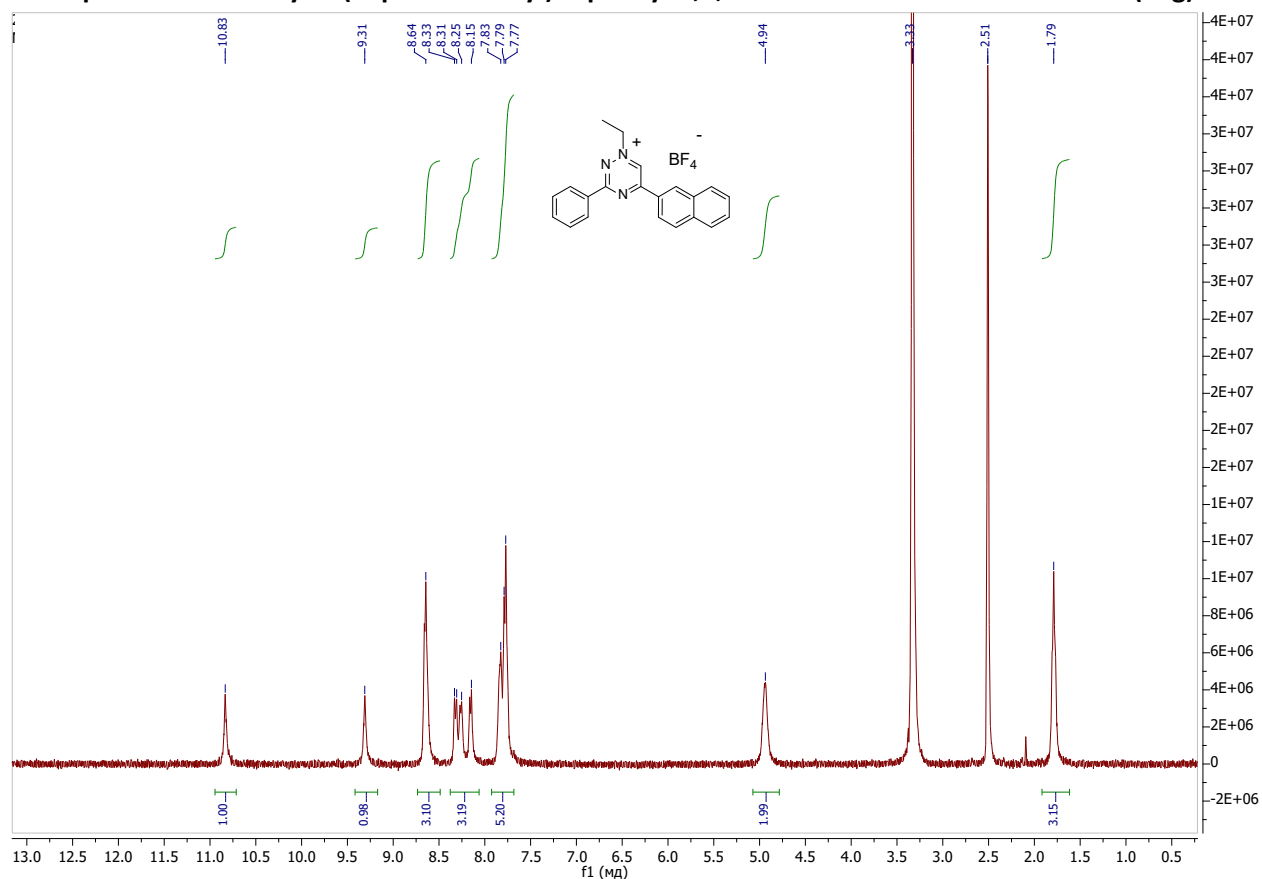

**Figure S10.  $^1\text{H}$  NMR (400 MHz,  $\text{DMSO}-d_6$ ) spectra of 10g**

**Spectrum of 1-ethyl-3-phenyl-5-(thiophen-2-yl)-1,2,4-triazin-1-ium tetrafluoroborate (10h).**

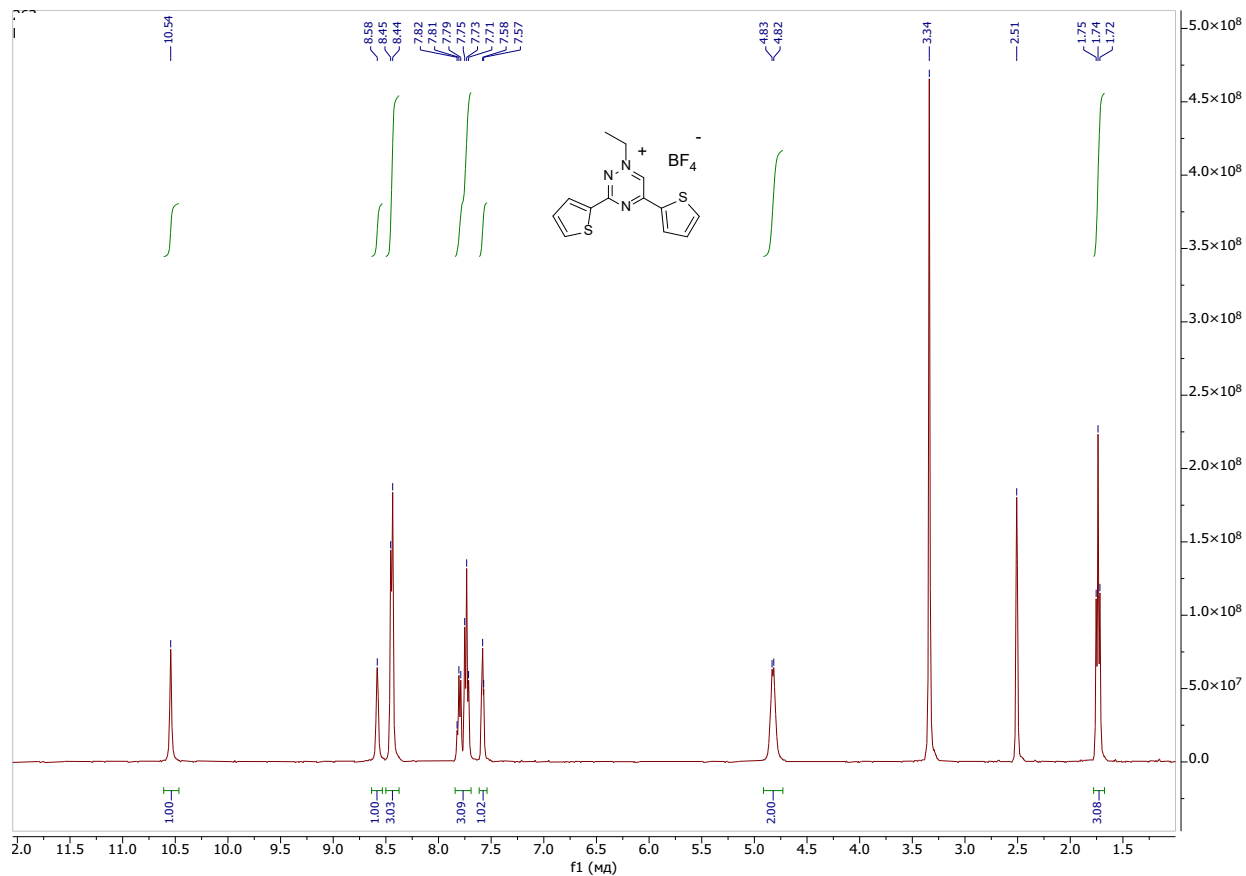

**Figure S11.  $^1\text{H}$  NMR (400 MHz,  $\text{DMSO}-d_6$ ) spectra of 10h**

**Spectrum of 1-Ethyl-5-phenyl-3-(*p*-tolyl)-1,2,4-triazin-1-ium tetrafluoroborate (11a).**

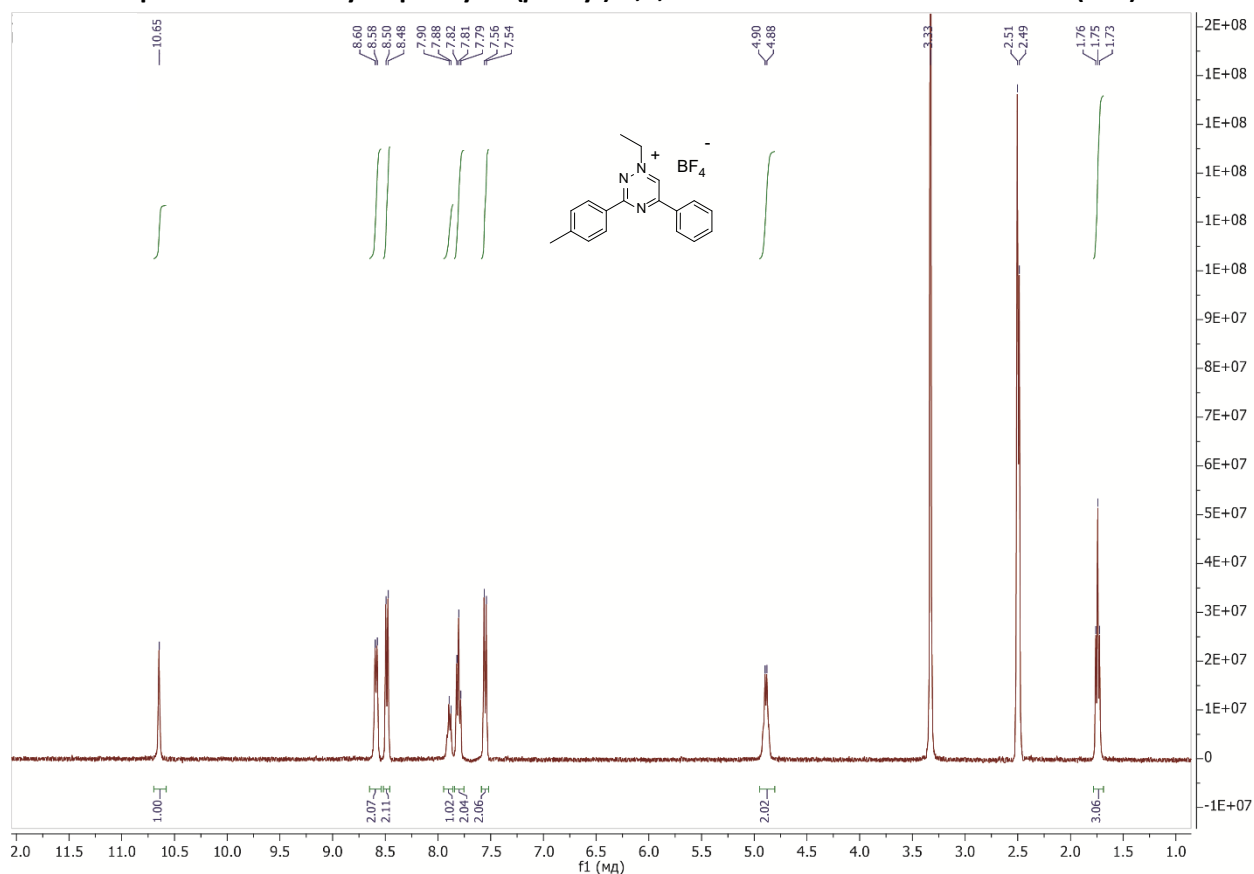

**Figure S12.** <sup>1</sup>H NMR (400 MHz, DMSO-*d*<sub>6</sub>) spectra of **11a**.

**Spectrum of 5-(4-bromophenyl)-1-ethyl-3-(*p*-tolyl)-1,2,4-triazin-1-ium tetrafluoroborate (11b).**

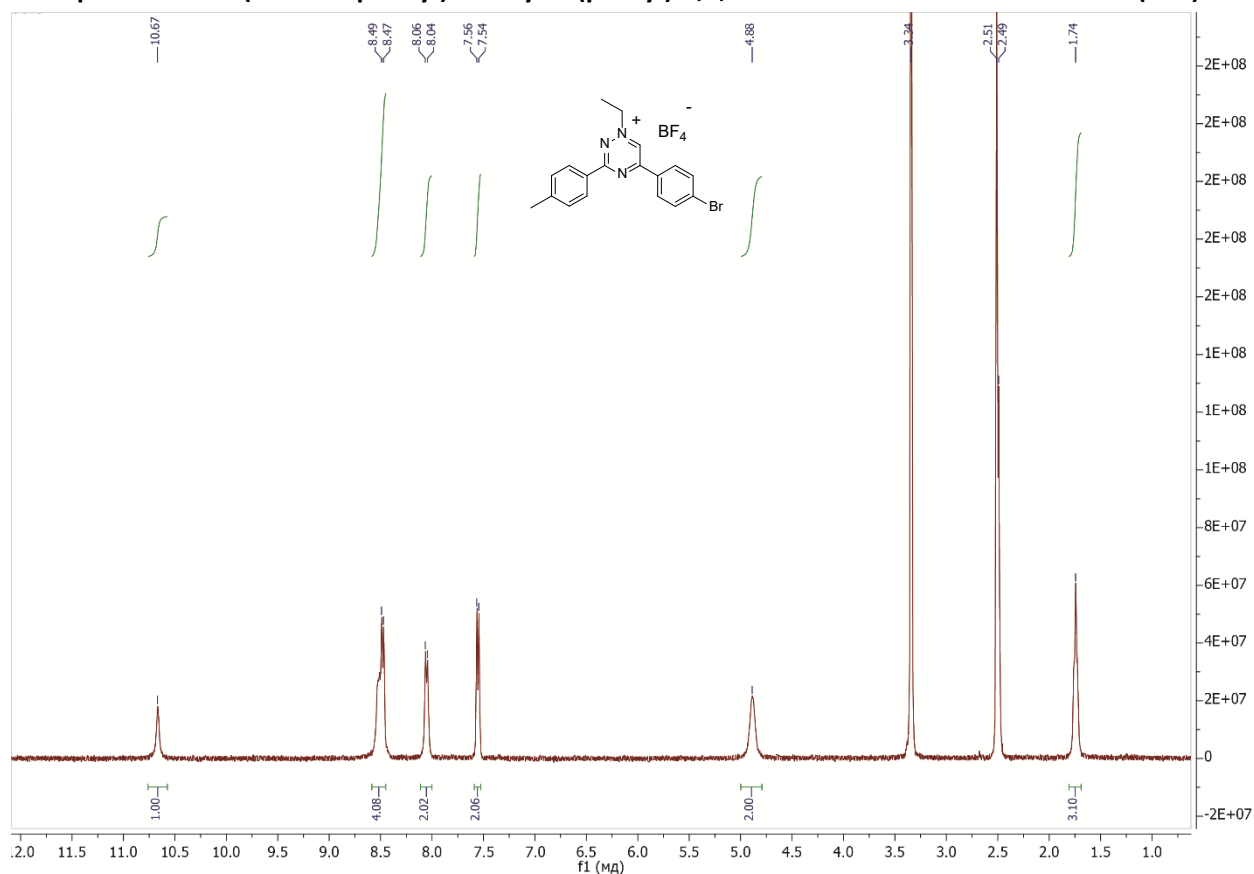

**Figure S13.** <sup>1</sup>H NMR (400 MHz, DMSO-*d*<sub>6</sub>) spectra of **11b**



Spectrum of 5-(3,4-dimethylphenyl)-1-ethyl-3-(*p*-tolyl)-1,2,4-triazin-1-ium tetrafluoroborate (**11e**).

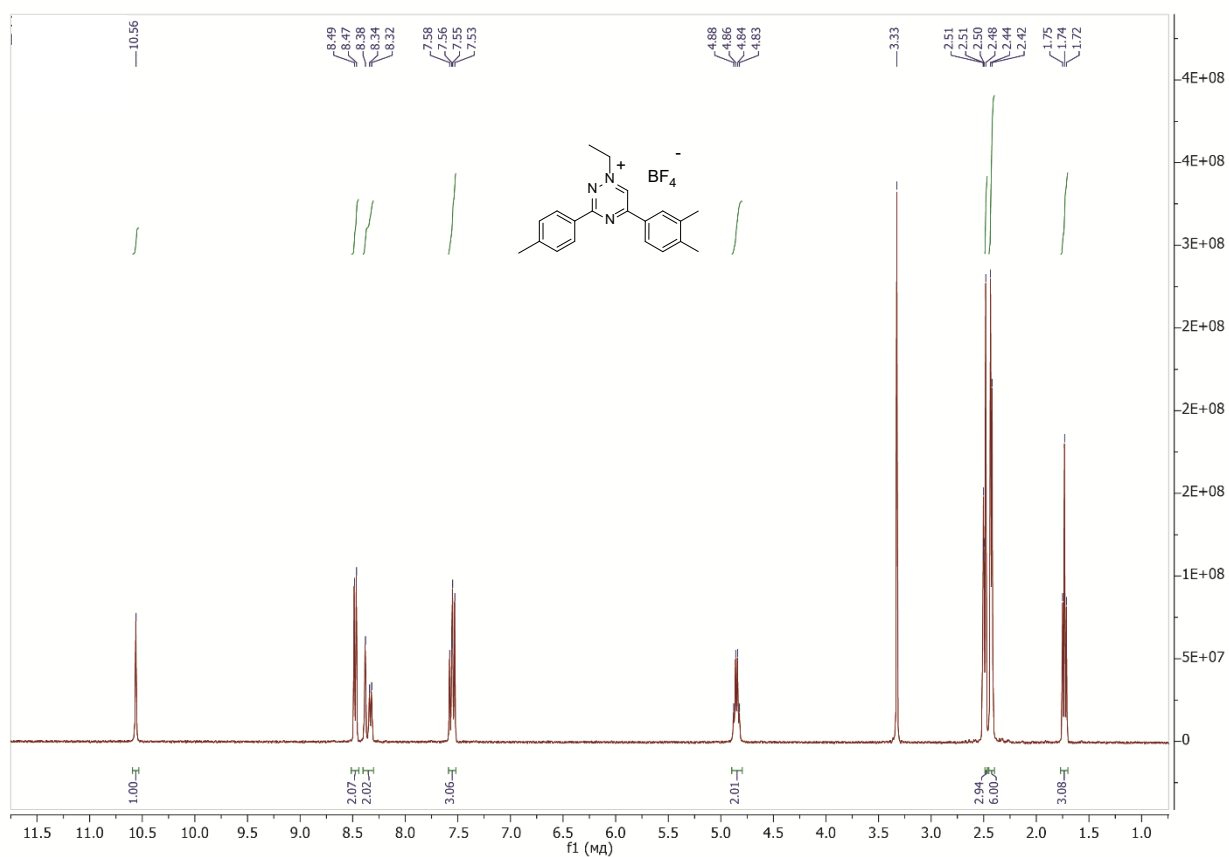

Figure S14. <sup>1</sup>H NMR (400 MHz, DMSO-*d*<sub>6</sub>) spectra of **11e**

Spectrum of 1-ethyl-5-(4-methoxyphenyl)-3-(*p*-tolyl)-1,2,4-triazin-1-ium tetrafluoroborate (**11f**).

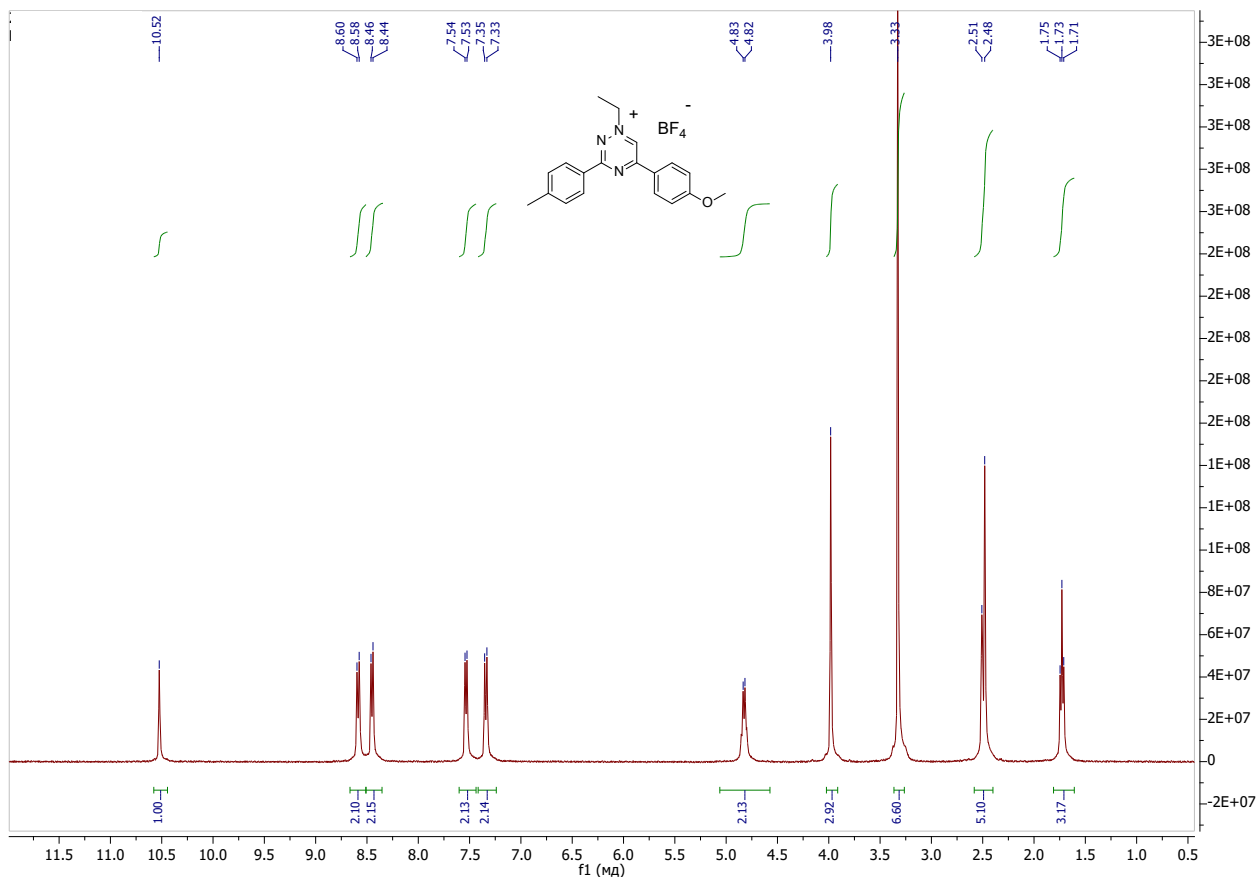

Figure S15. <sup>1</sup>H NMR (400 MHz, DMSO-*d*<sub>6</sub>) spectra of **11f**

Spectrum of 1-ethyl-5-(naphthalen-2-yl)-3-(*p*-tolyl)-1,2,4-triazin-1-ium tetrafluoroborate (**11g**).

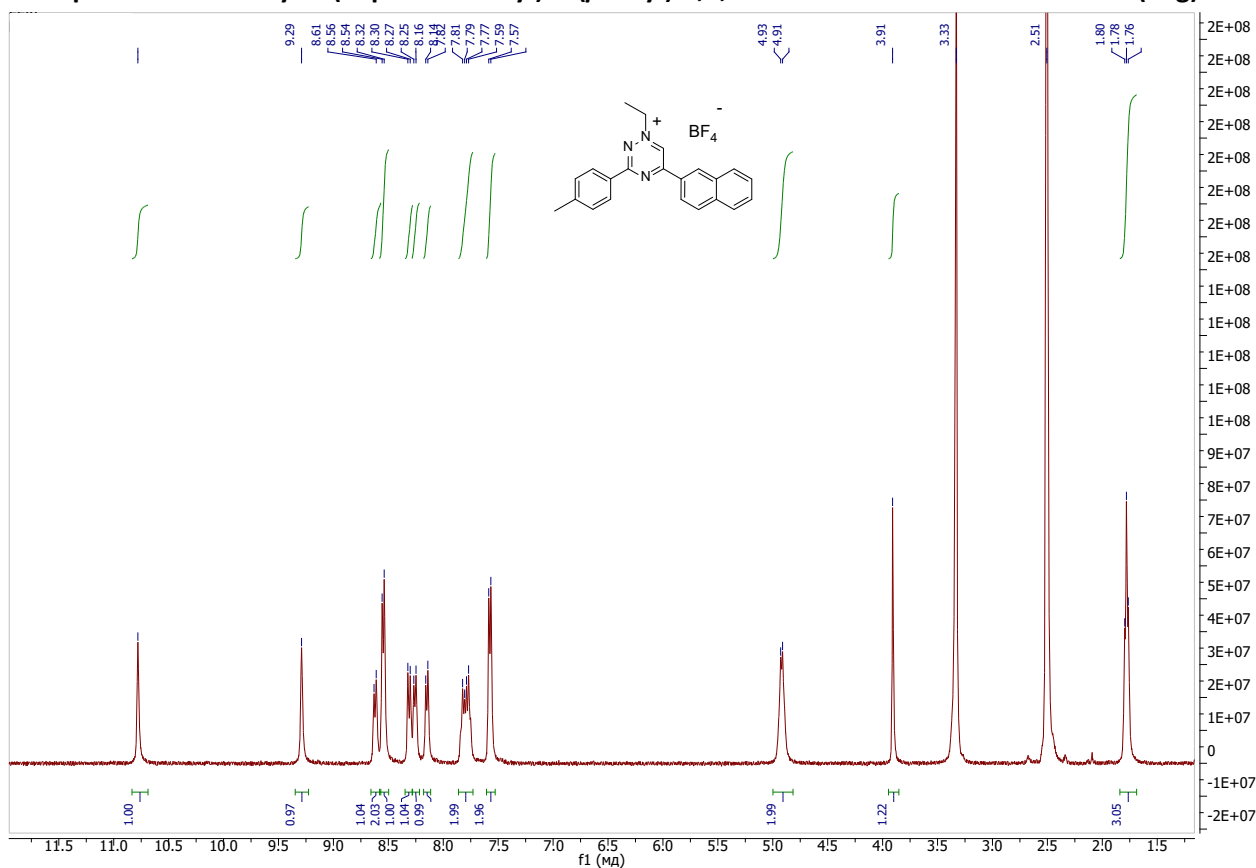

Figure S16.  $^1\text{H}$  NMR (400 MHz,  $\text{DMSO}-d_6$ ) spectra of **11g**

Spectrum of 1-ethyl-5-phenyl-3-(thiophen-2-yl)-1,2,4-triazin-1-ium tetrafluoroborate (**12a**).

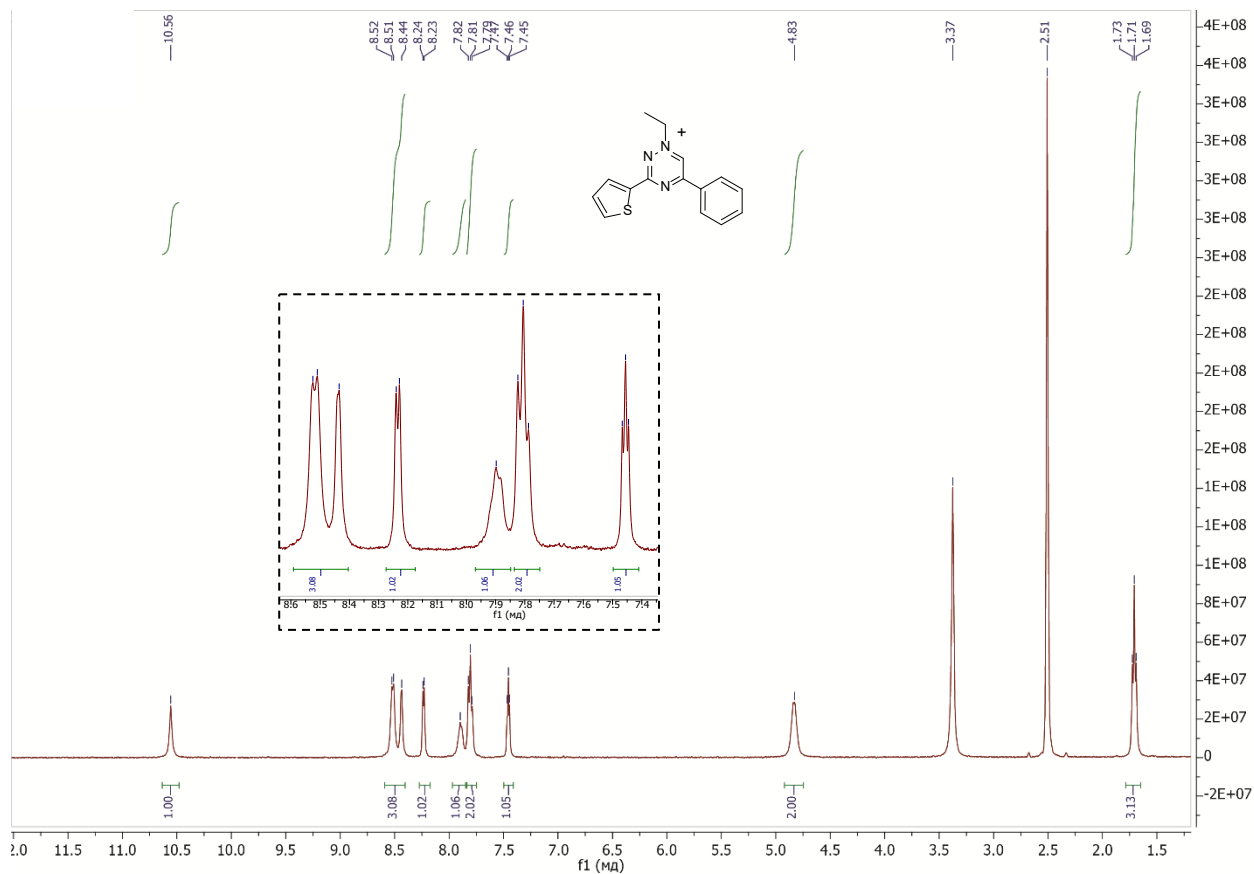

Figure S17.  $^1\text{H}$  NMR (400 MHz,  $\text{DMSO}-d_6$ ) spectra of **12a**

Spectrum of 1-ethyl-5-(4-methoxyphenyl)-3-(thiophen-2-yl)-1,2,4-triazin-1-ium tetrafluoroborate (**12f**).

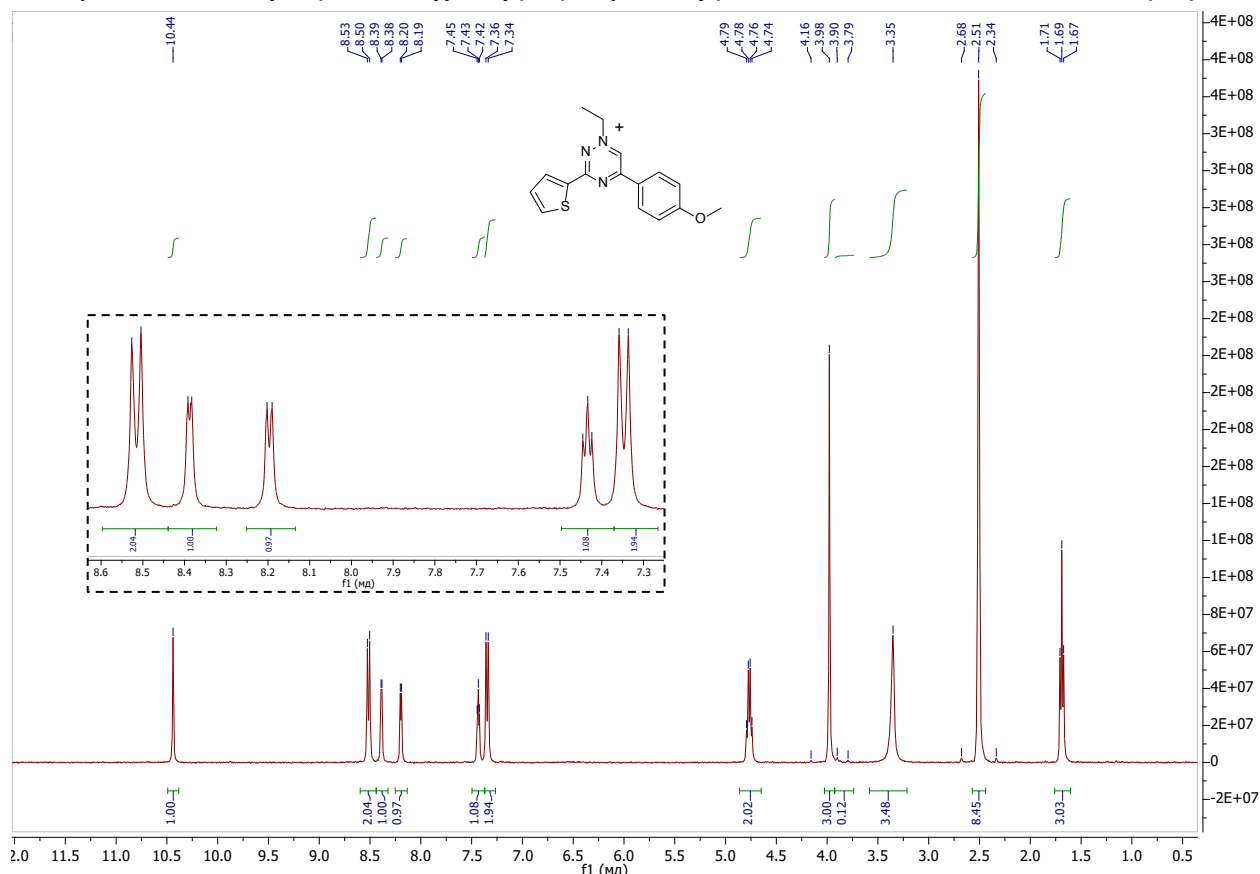

Figure S18. <sup>1</sup>H NMR (400 MHz, DMSO-*d*<sub>6</sub>) spectra of **12f**

Spectrum of 1-ethyl-5-(naphthalen-2-yl)-3-(thiophen-2-yl)-1,2,4-triazin-1-ium tetrafluoroborate (**12g**).

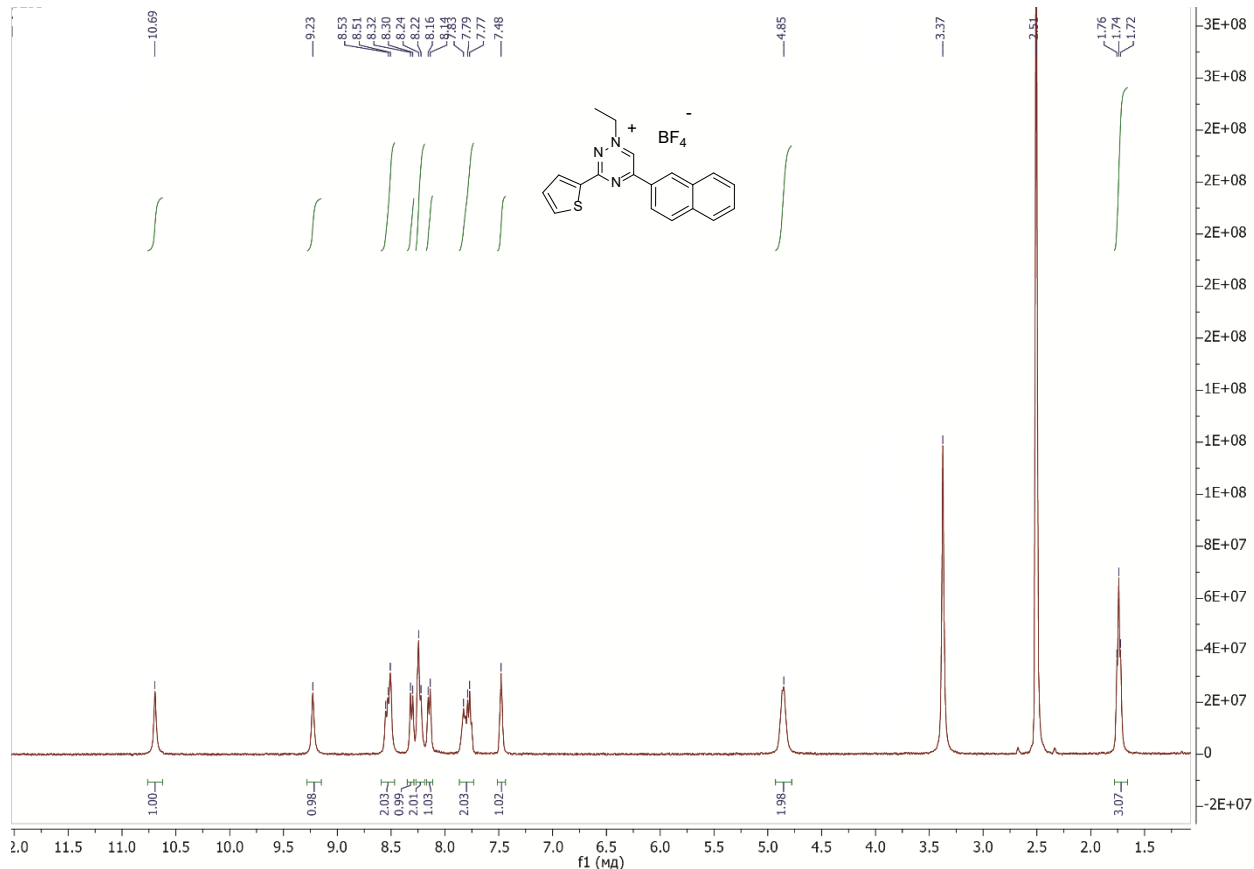

Figure S19. <sup>1</sup>H NMR (400 MHz, DMSO-*d*<sub>6</sub>) spectra of **12g**

Spectrum of 1-ethyl-3,5-di(thiophen-2-yl)-1,2,4-triazin-1-ium tetrafluoroborate (**12h**).

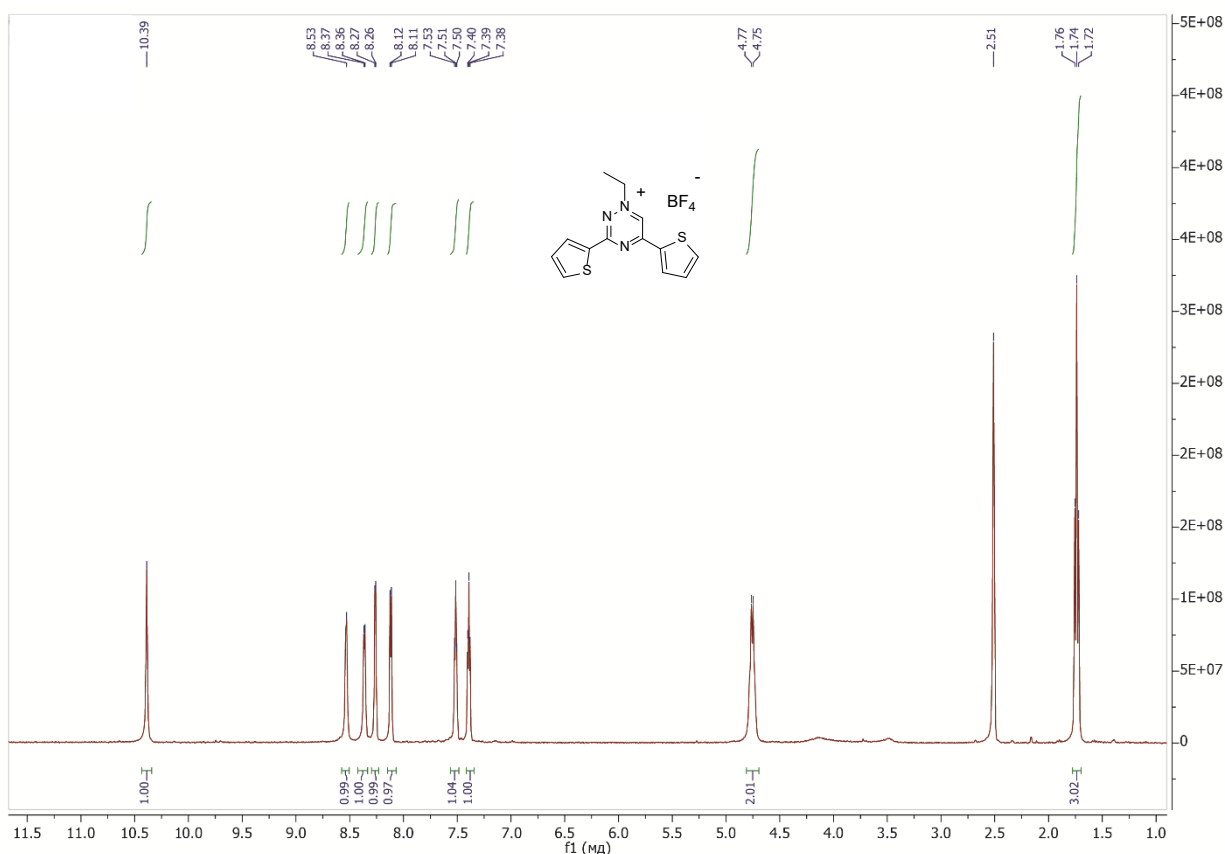

Figure S20. <sup>1</sup>H NMR (400 MHz, DMSO-*d*<sub>6</sub>) spectra of **12h**

Spectrum of 3-(4-chlorophenyl)-1-ethyl-5-phenyl-1,2,4-triazin-1-ium tetrafluoroborate (**13a**).

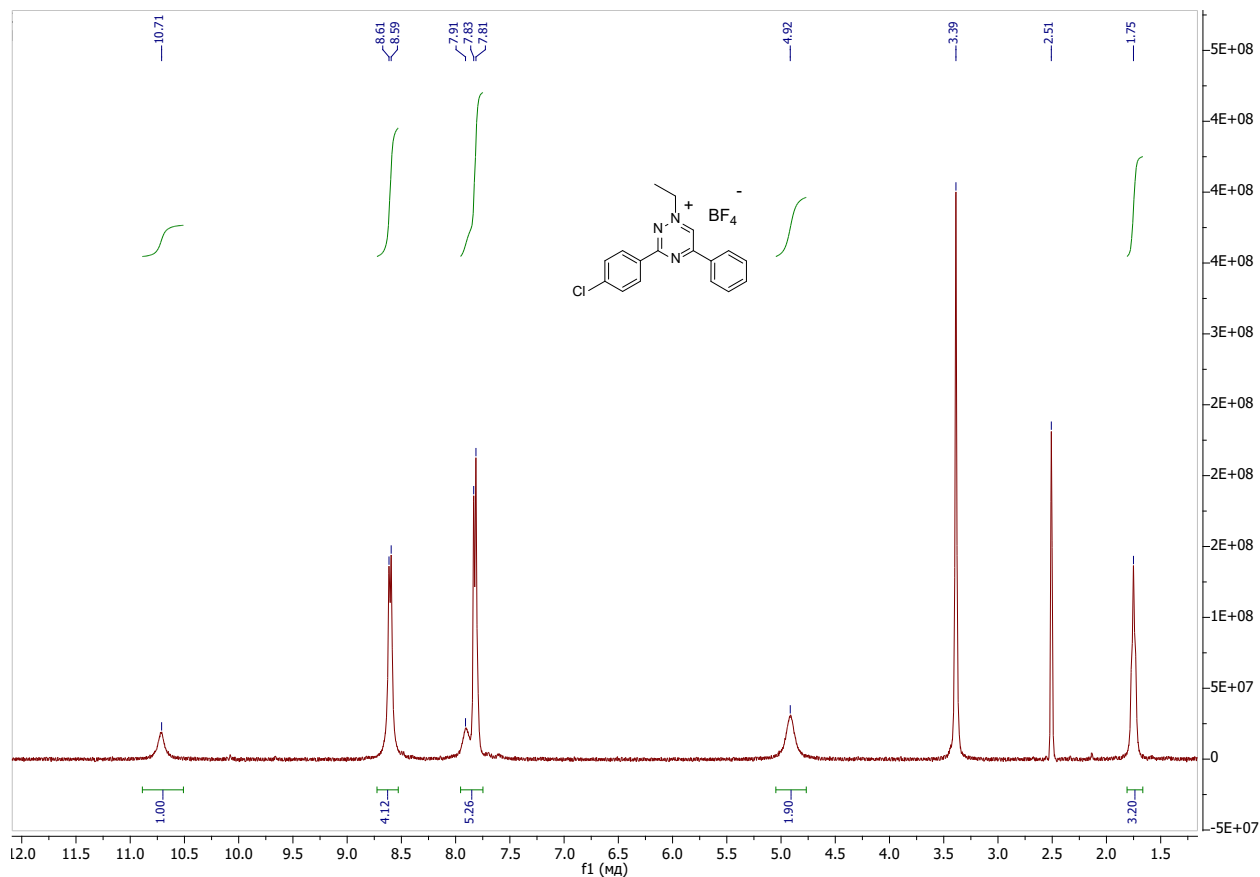

Figure S21. <sup>1</sup>H NMR (400 MHz, DMSO-*d*<sub>6</sub>) spectra of **13a**

**Spectra of compounds**  
**Dimethyl 7-methyl-2,4-diphenylpyrrolo[2,1-f][1,2,4]triazine-5,6-dicarboxylate (14a)**

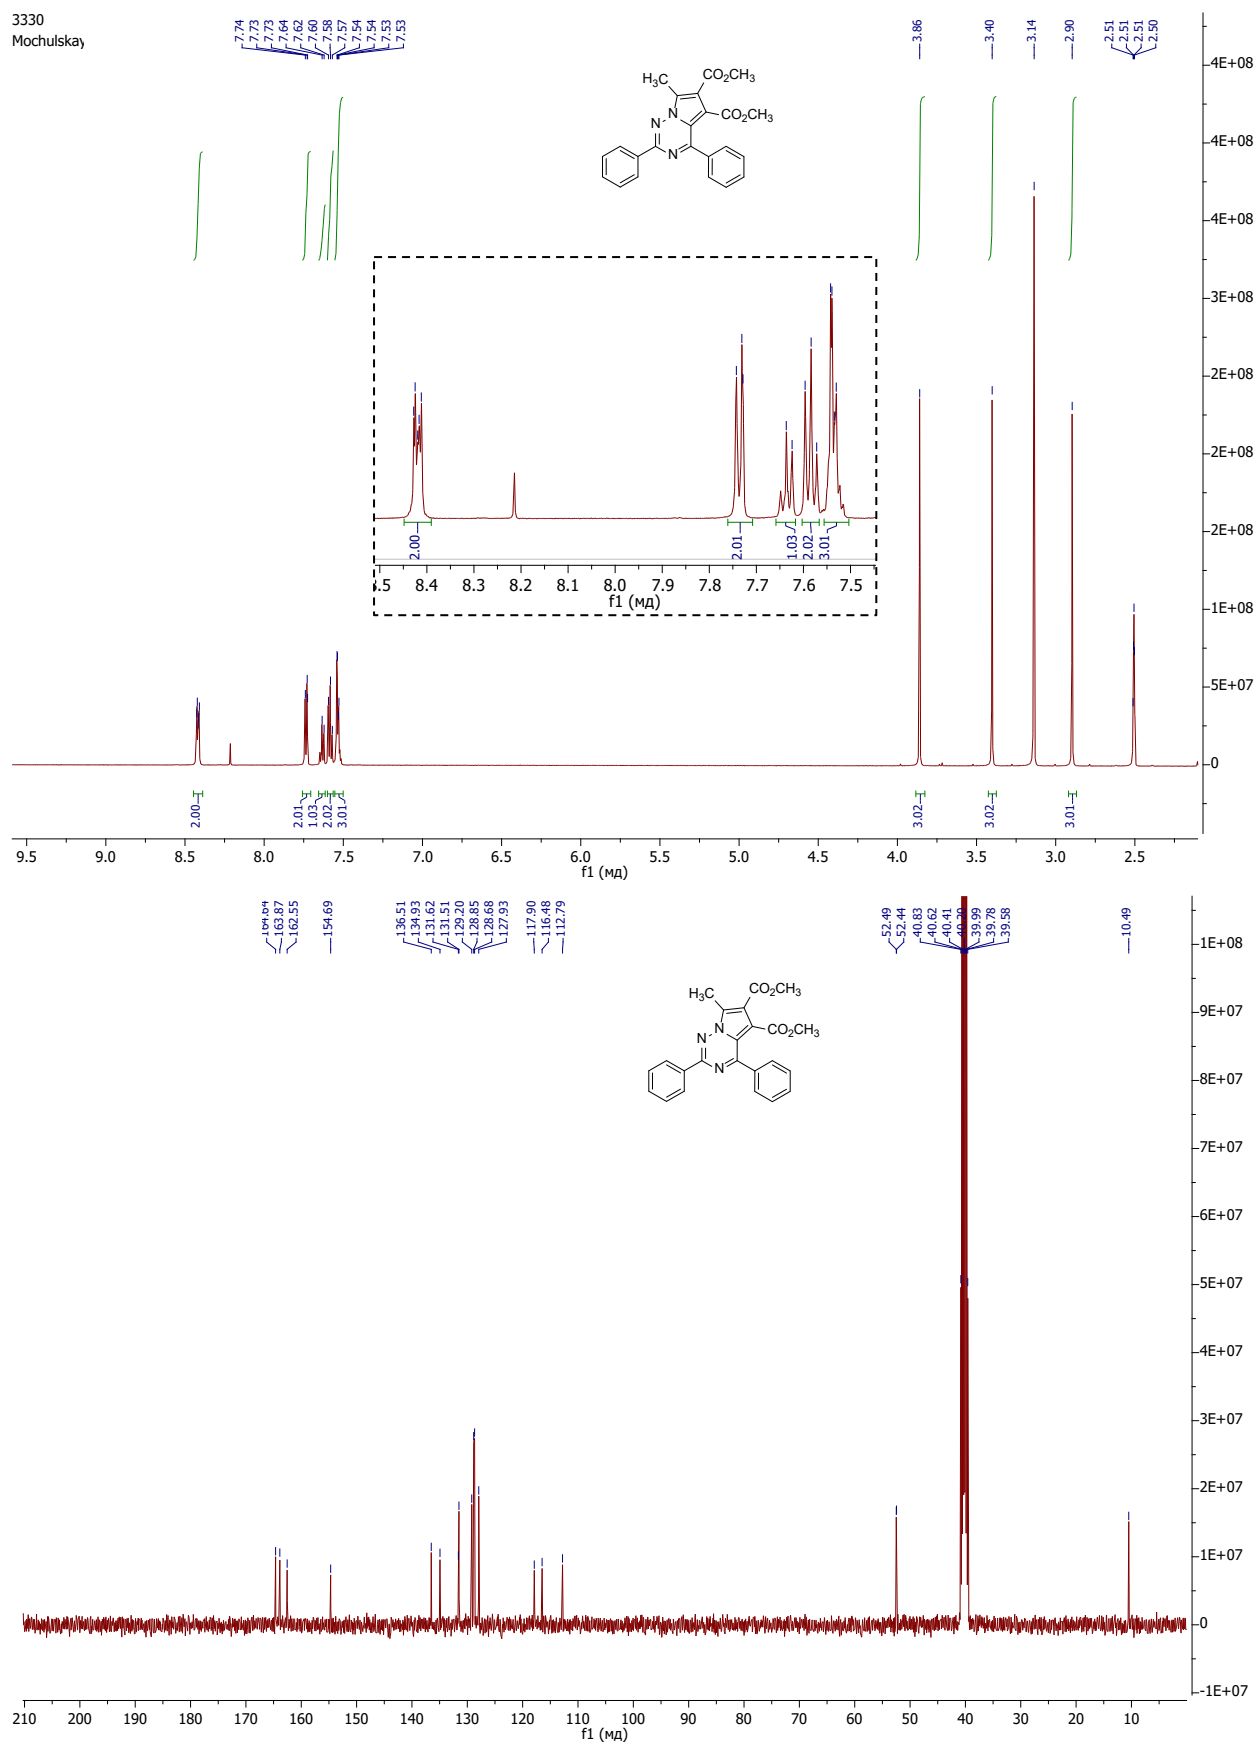

**Figure S22.** <sup>1</sup>H NMR (600 MHz, DMSO-*d*<sub>6</sub>) and <sup>13</sup>C NMR (101 MHz, DMSO-*d*<sub>6</sub>, t = 50 °C) spectra of **14a**

**Spectra of compounds**  
**Dimethyl 4-(4-bromophenyl)-7-methyl-2-phenylpyrrolo[2,1-f][1,2,4]triazine-5,6-dicarboxylate (14b)**

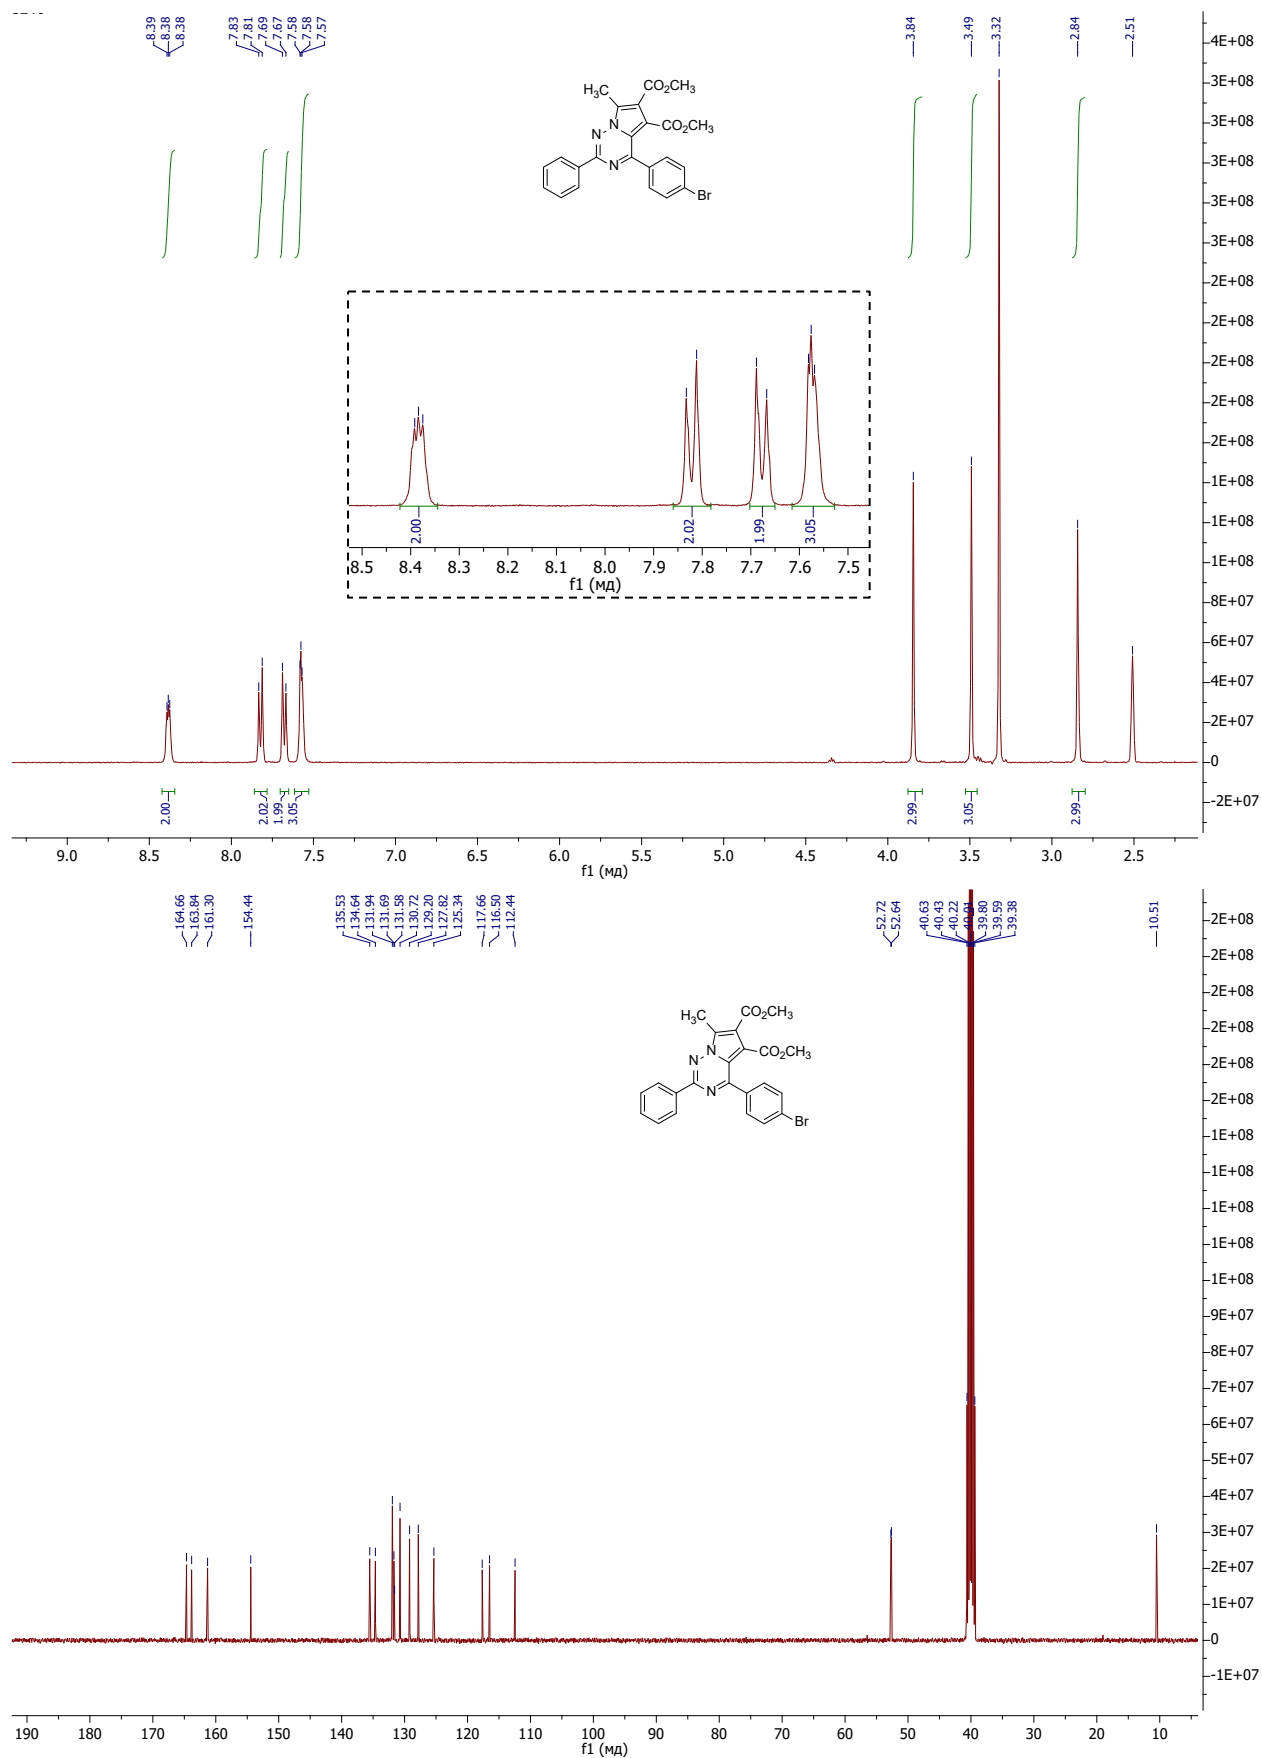

**Figure S23.** <sup>1</sup>H NMR (400 MHz, DMSO-*d*<sub>6</sub>) and <sup>13</sup>C NMR (101 MHz, DMSO-*d*<sub>6</sub>) spectra of **14b**

**Spectra of compounds**  
**Dimethyl 7-methyl-2-phenyl-4-(*p*-tolyl)pyrrolo[2,1-*f*][1,2,4]triazine-5,6-dicarboxylate (**14d**)**

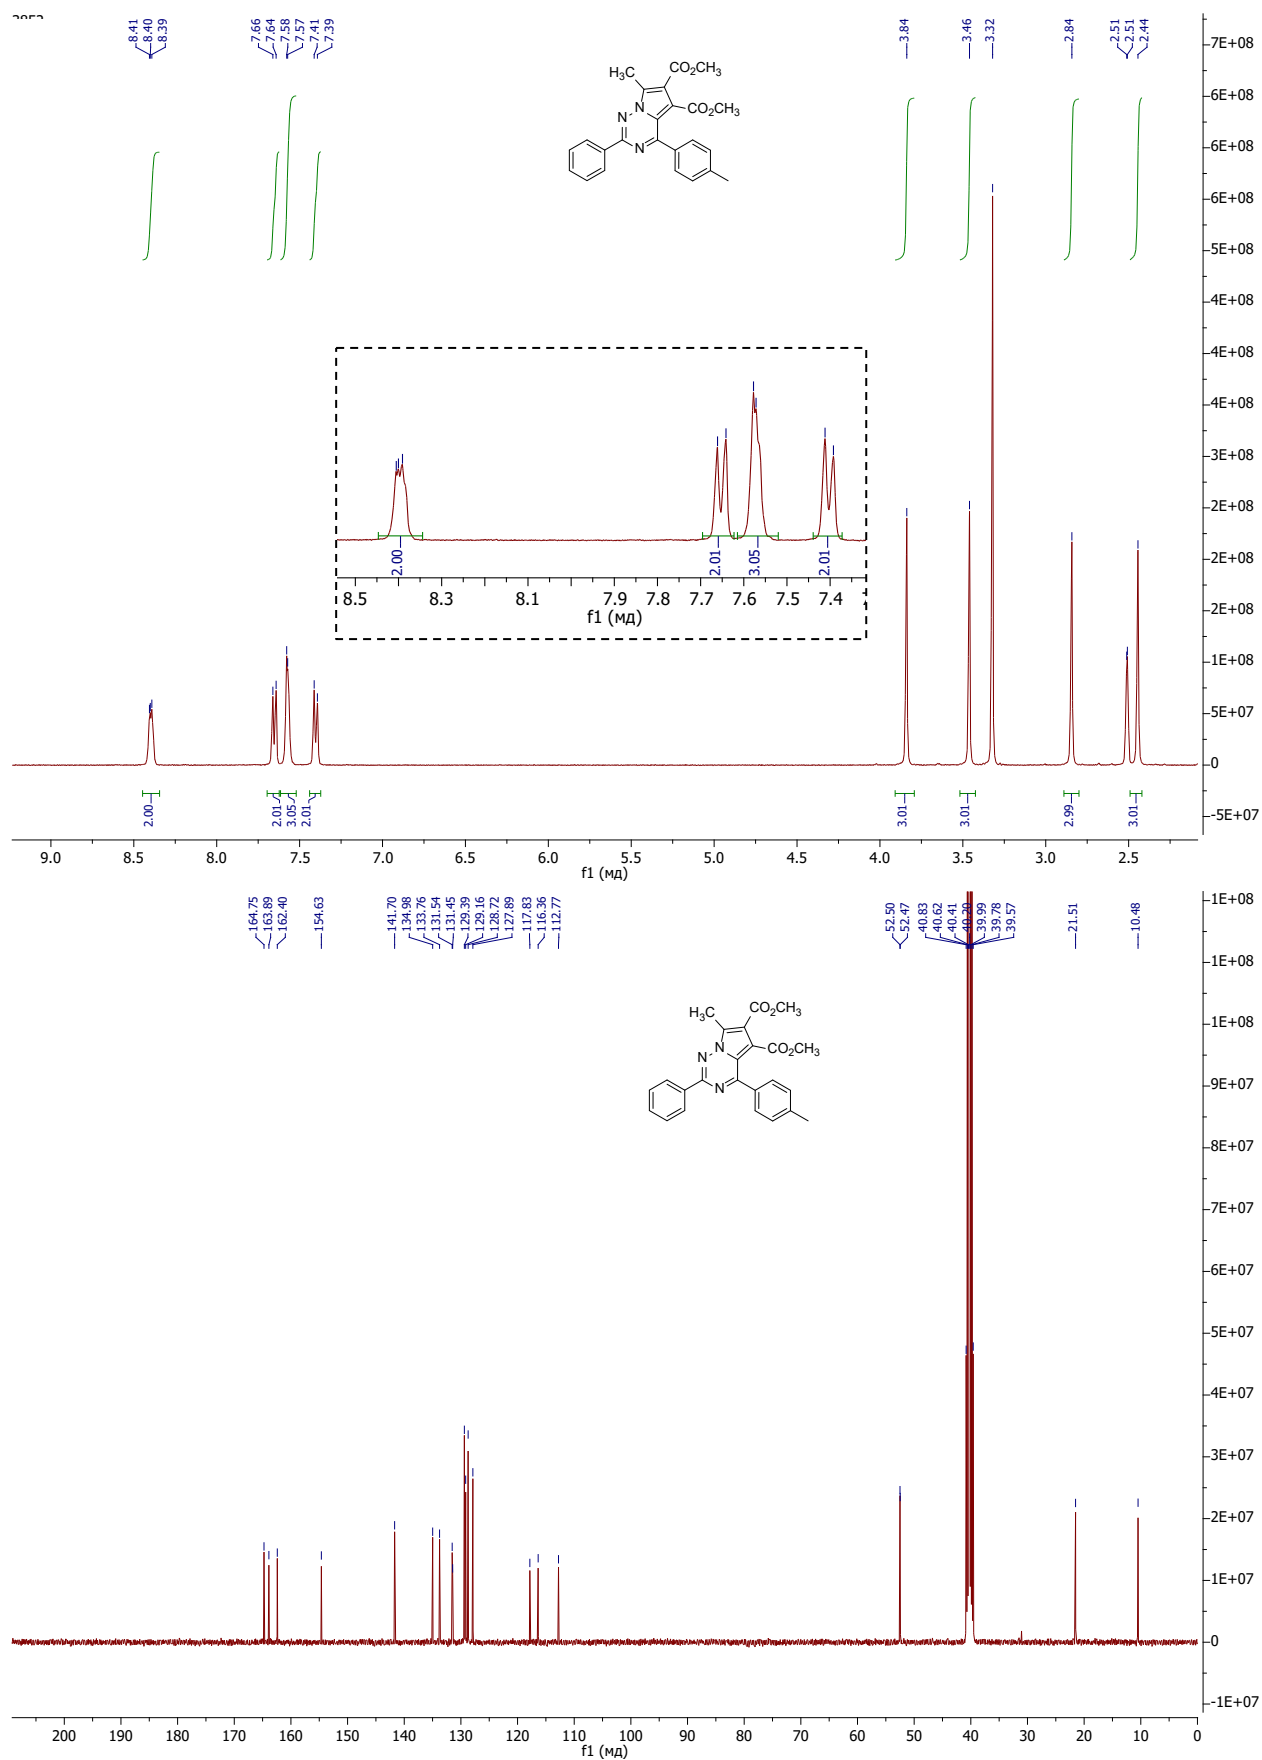

**Figure S24.** <sup>1</sup>H NMR (400 MHz, DMSO-*d*<sub>6</sub>) and <sup>13</sup>C NMR (101 MHz, DMSO-*d*<sub>6</sub>, *t* = 50 °C) spectra of **14d**

# Spectra of compounds

## Dimethyl 4-(3,4-dimethylphenyl)-7-methyl-2-phenylpyrrolo[2,1-f][1,2,4]triazine-5,6-dicarboxylate (**14e**)

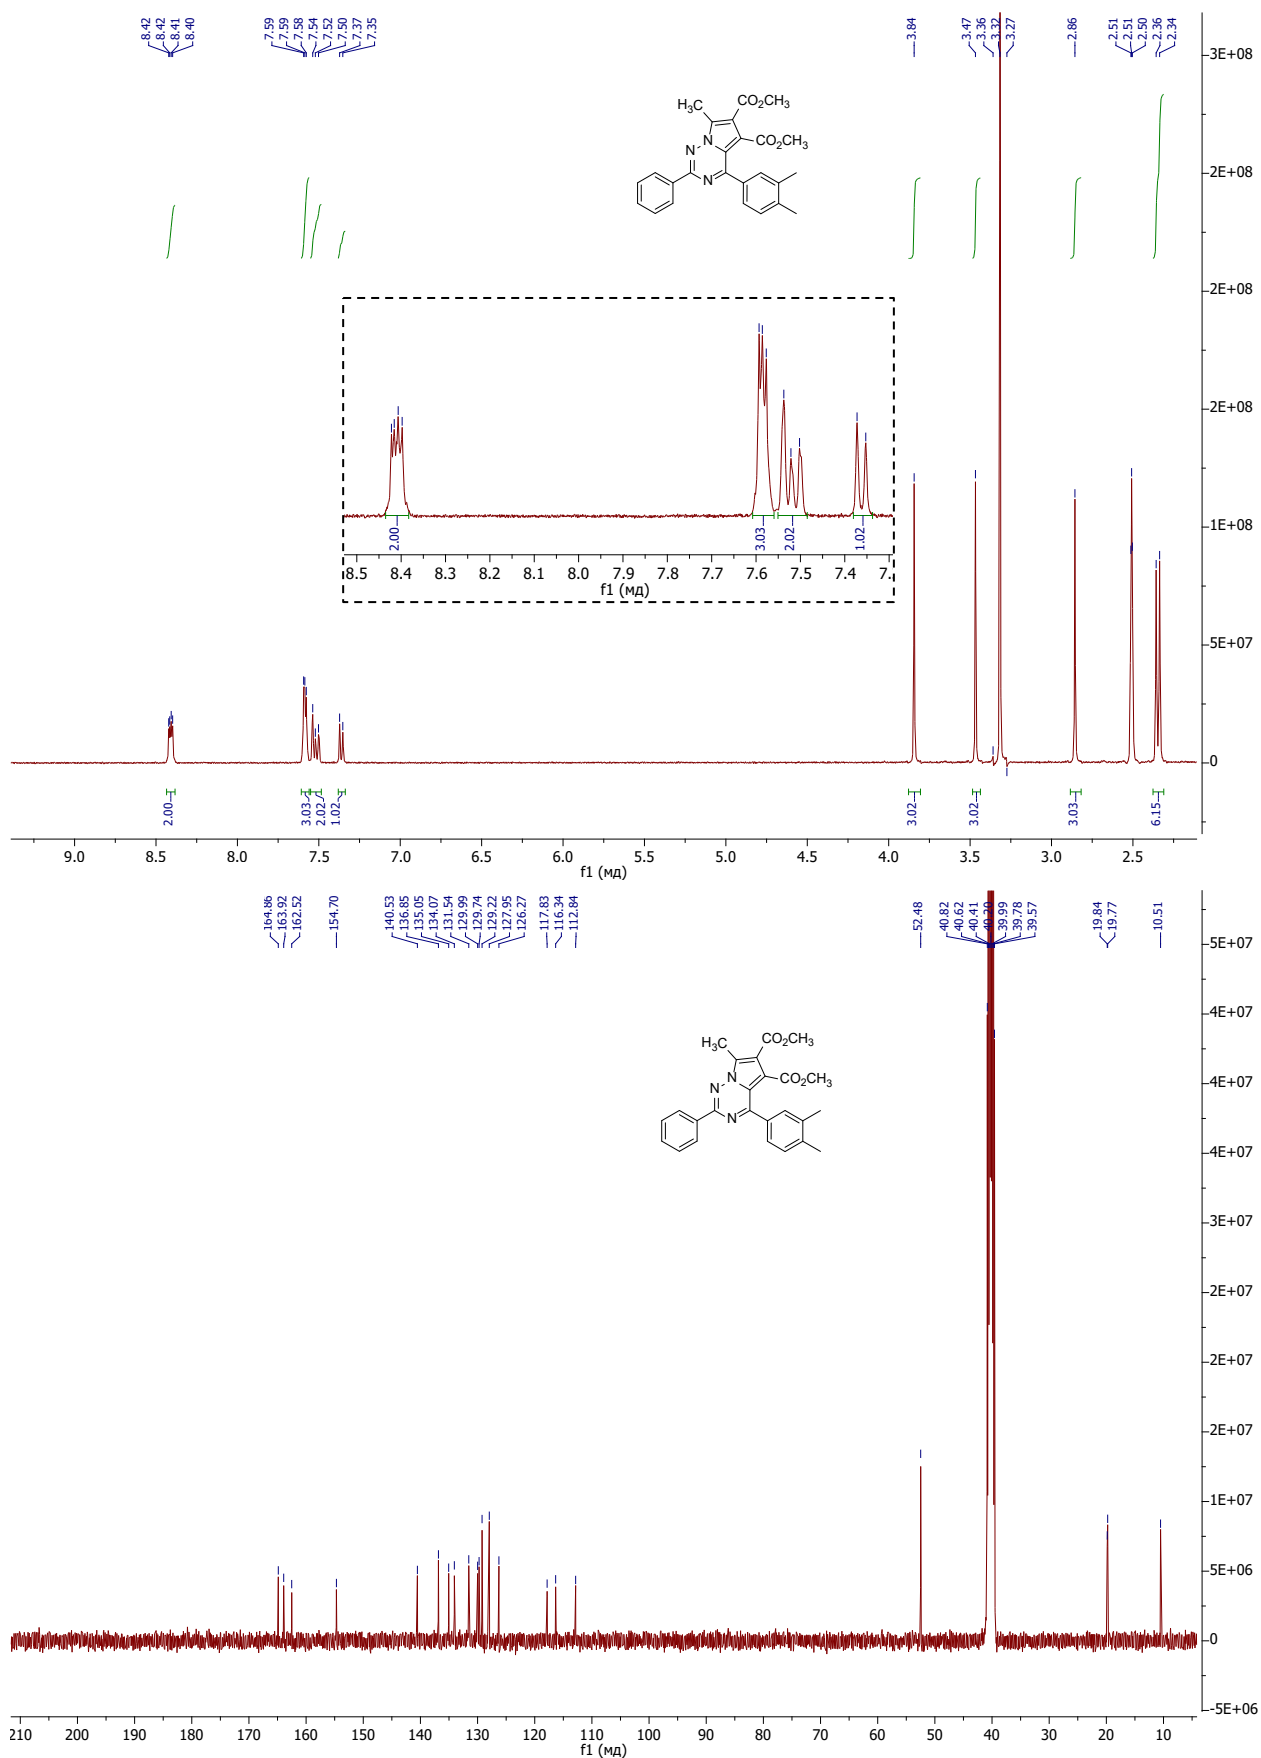

Figure S25. <sup>1</sup>H NMR (400 MHz, DMSO-*d*<sub>6</sub>) and <sup>13</sup>C NMR (101 MHz, DMSO-*d*<sub>6</sub>, t = 50 °C) spectra of **14d**



**Spectra of compounds**  
**Dimethyl 4-(4-methoxyphenyl)-7-methyl-2-phenylpyrrolo[2,1-f][1,2,4]triazine-5,6-dicarboxylate (14f)**

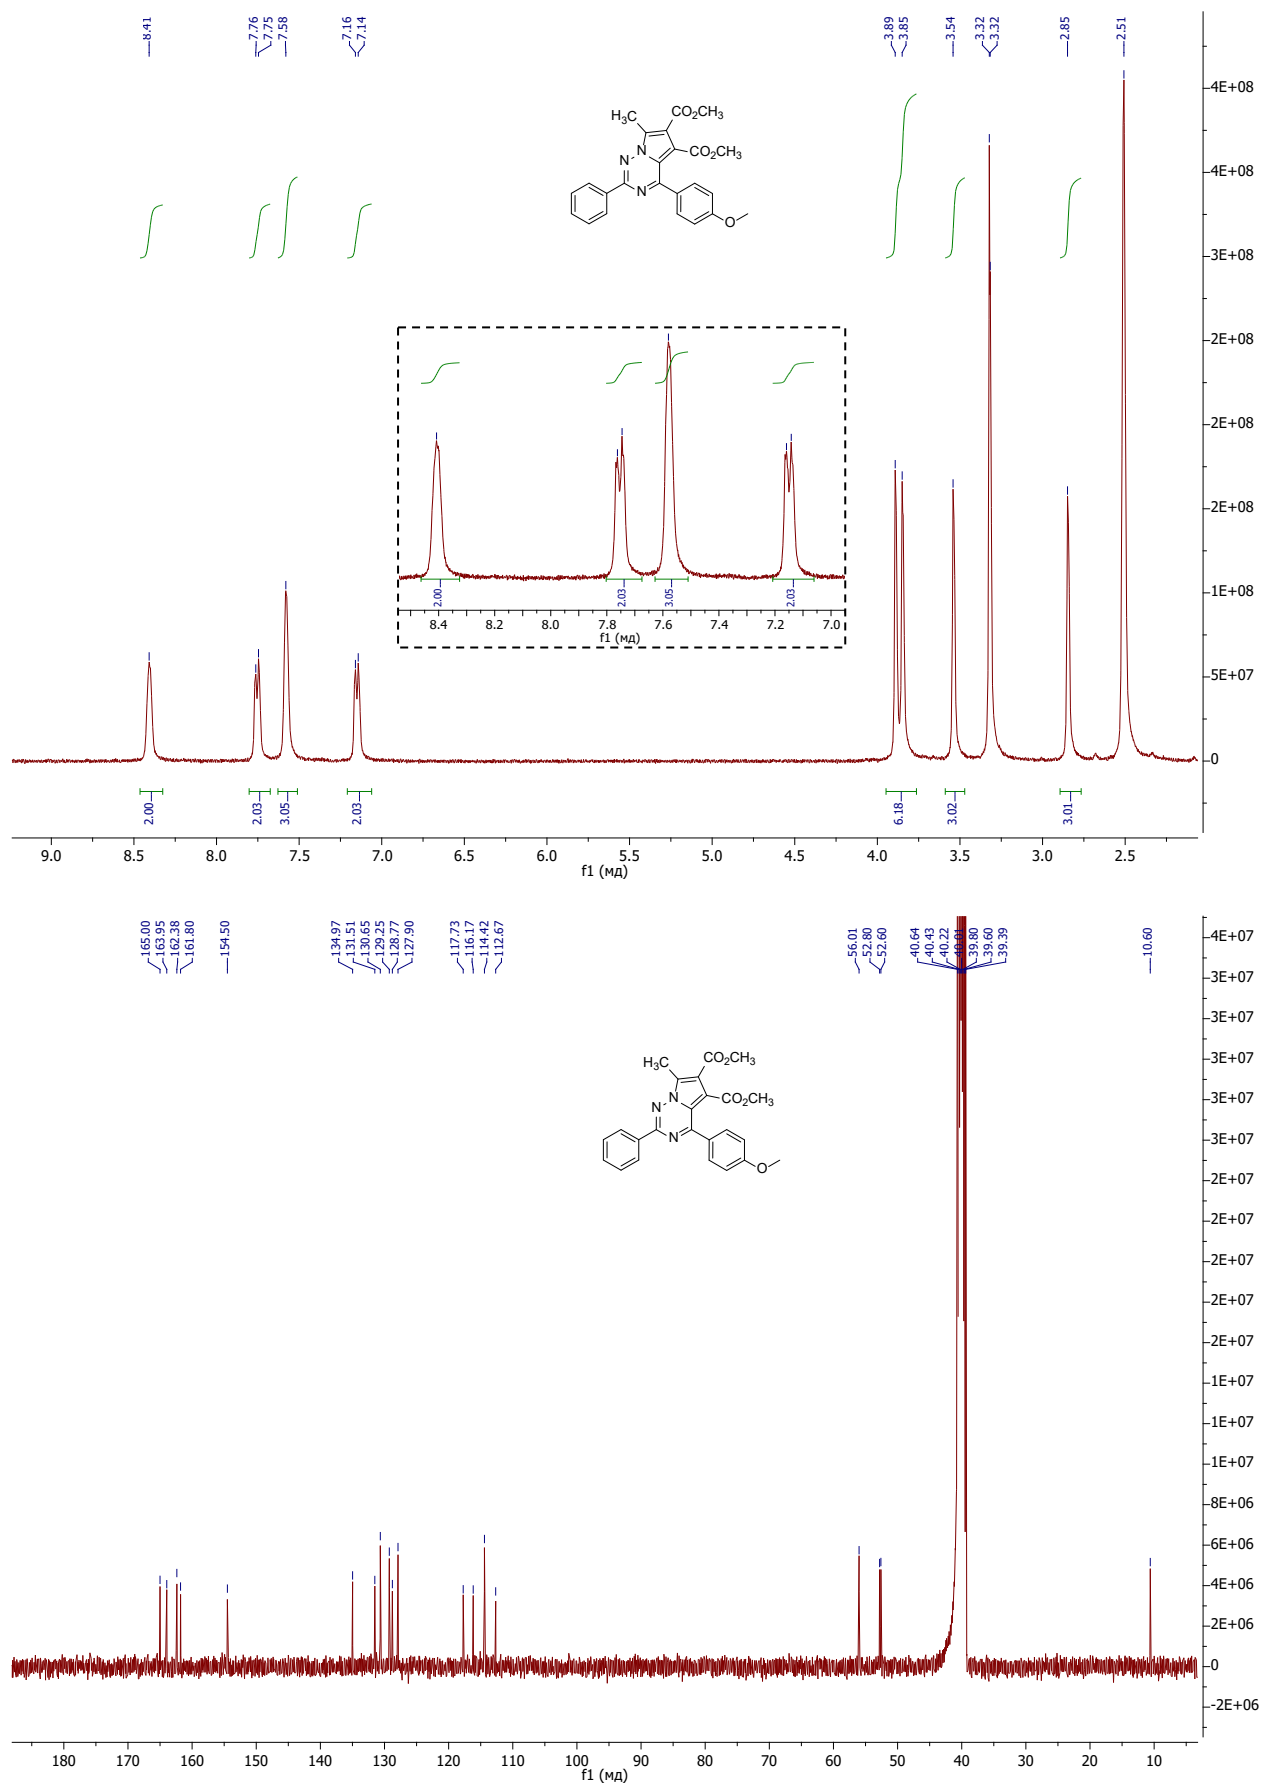

**Figure S26.** <sup>1</sup>H NMR (400 MHz, DMSO-*d*<sub>6</sub>) and <sup>13</sup>C NMR (101 MHz, DMSO-*d*<sub>6</sub>) spectra of **14f**

## Spectra of compounds

### Dimethyl 7-methyl-4-(naphthalen-2-yl)-2-phenylpyrrolo[2,1-f][1,2,4]triazine-5,6-dicarboxylate (**14g**)

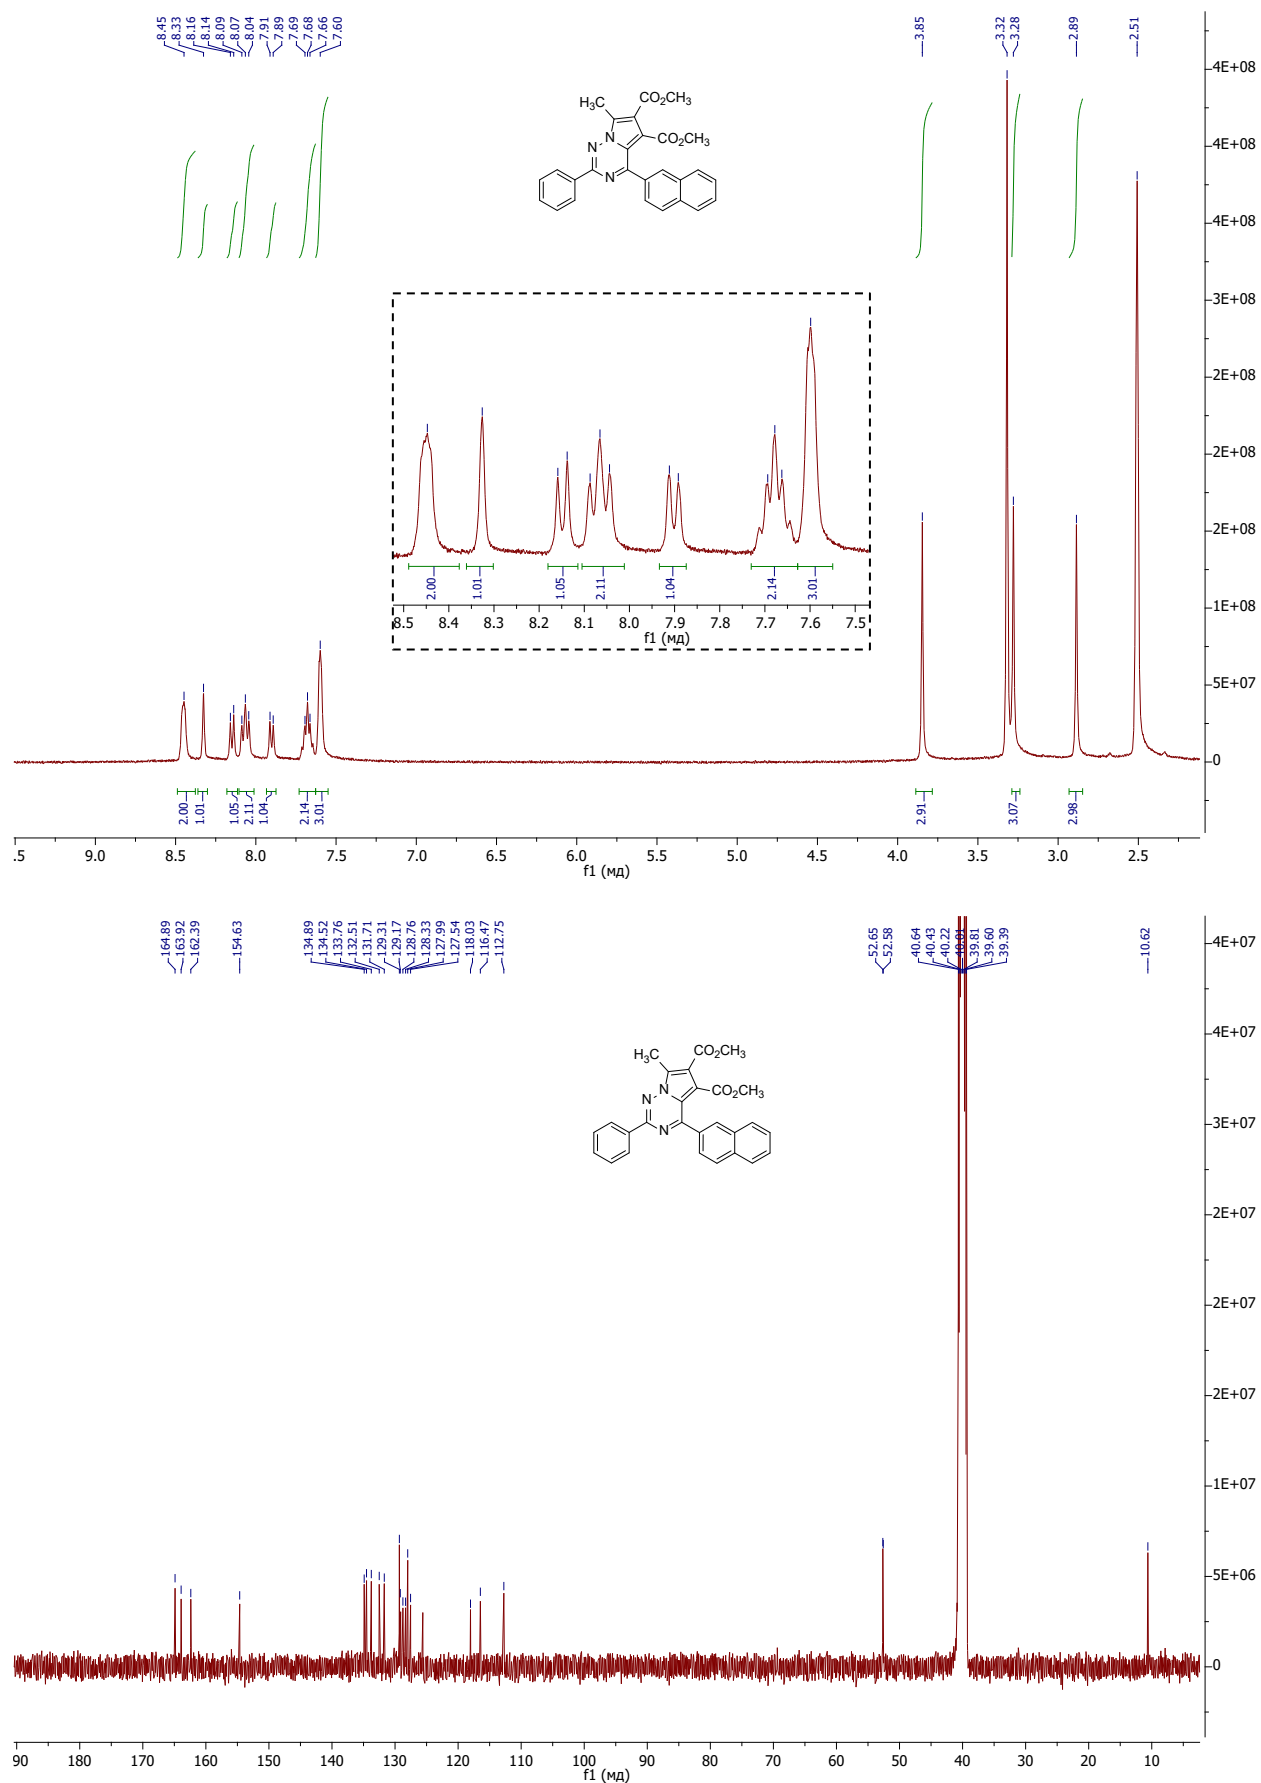

Figure S27. <sup>1</sup>H NMR (400 MHz, DMSO-*d*<sub>6</sub>) and <sup>13</sup>C NMR (101 MHz, DMSO-*d*<sub>6</sub>) spectra of **14g**

**Spectra of compounds**  
**Dimethyl 7-methyl-2-phenyl-4-(thiophen-2-yl)pyrrolo[2,1-f][1,2,4]triazine-5,6-dicarboxylate (14h)**

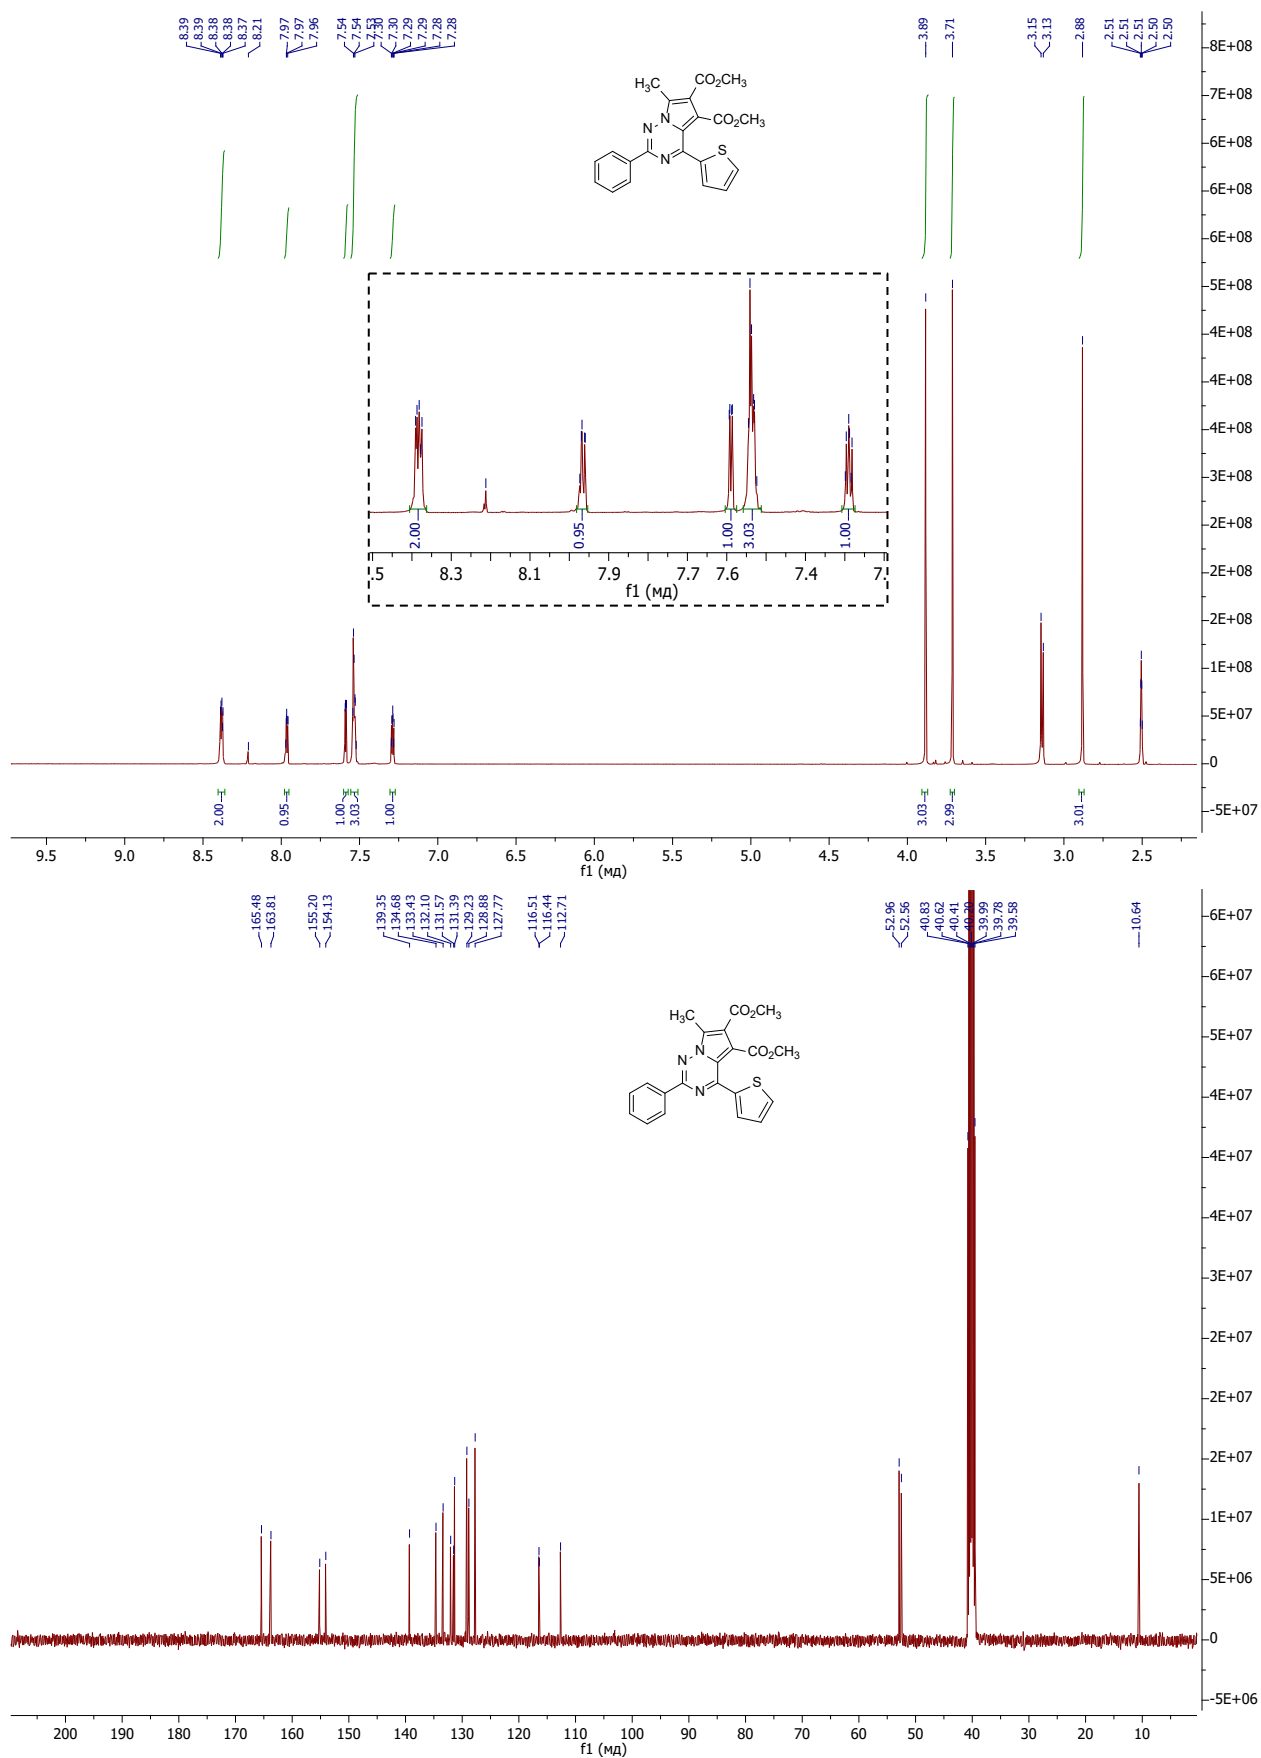

**Figure S28.** <sup>1</sup>H NMR (600 MHz, DMSO-*d*<sub>6</sub>) and <sup>13</sup>C NMR (101 MHz, DMSO-*d*<sub>6</sub>, t = 50 °C) spectra of **14h**

**Spectra of compounds**  
**Dimethyl 7-methyl-4-phenyl-2-*p*-tolylpyrrolo[2,1-*f*][1,2,4]triazine-5,6-dicarboxylate (**15a**)**

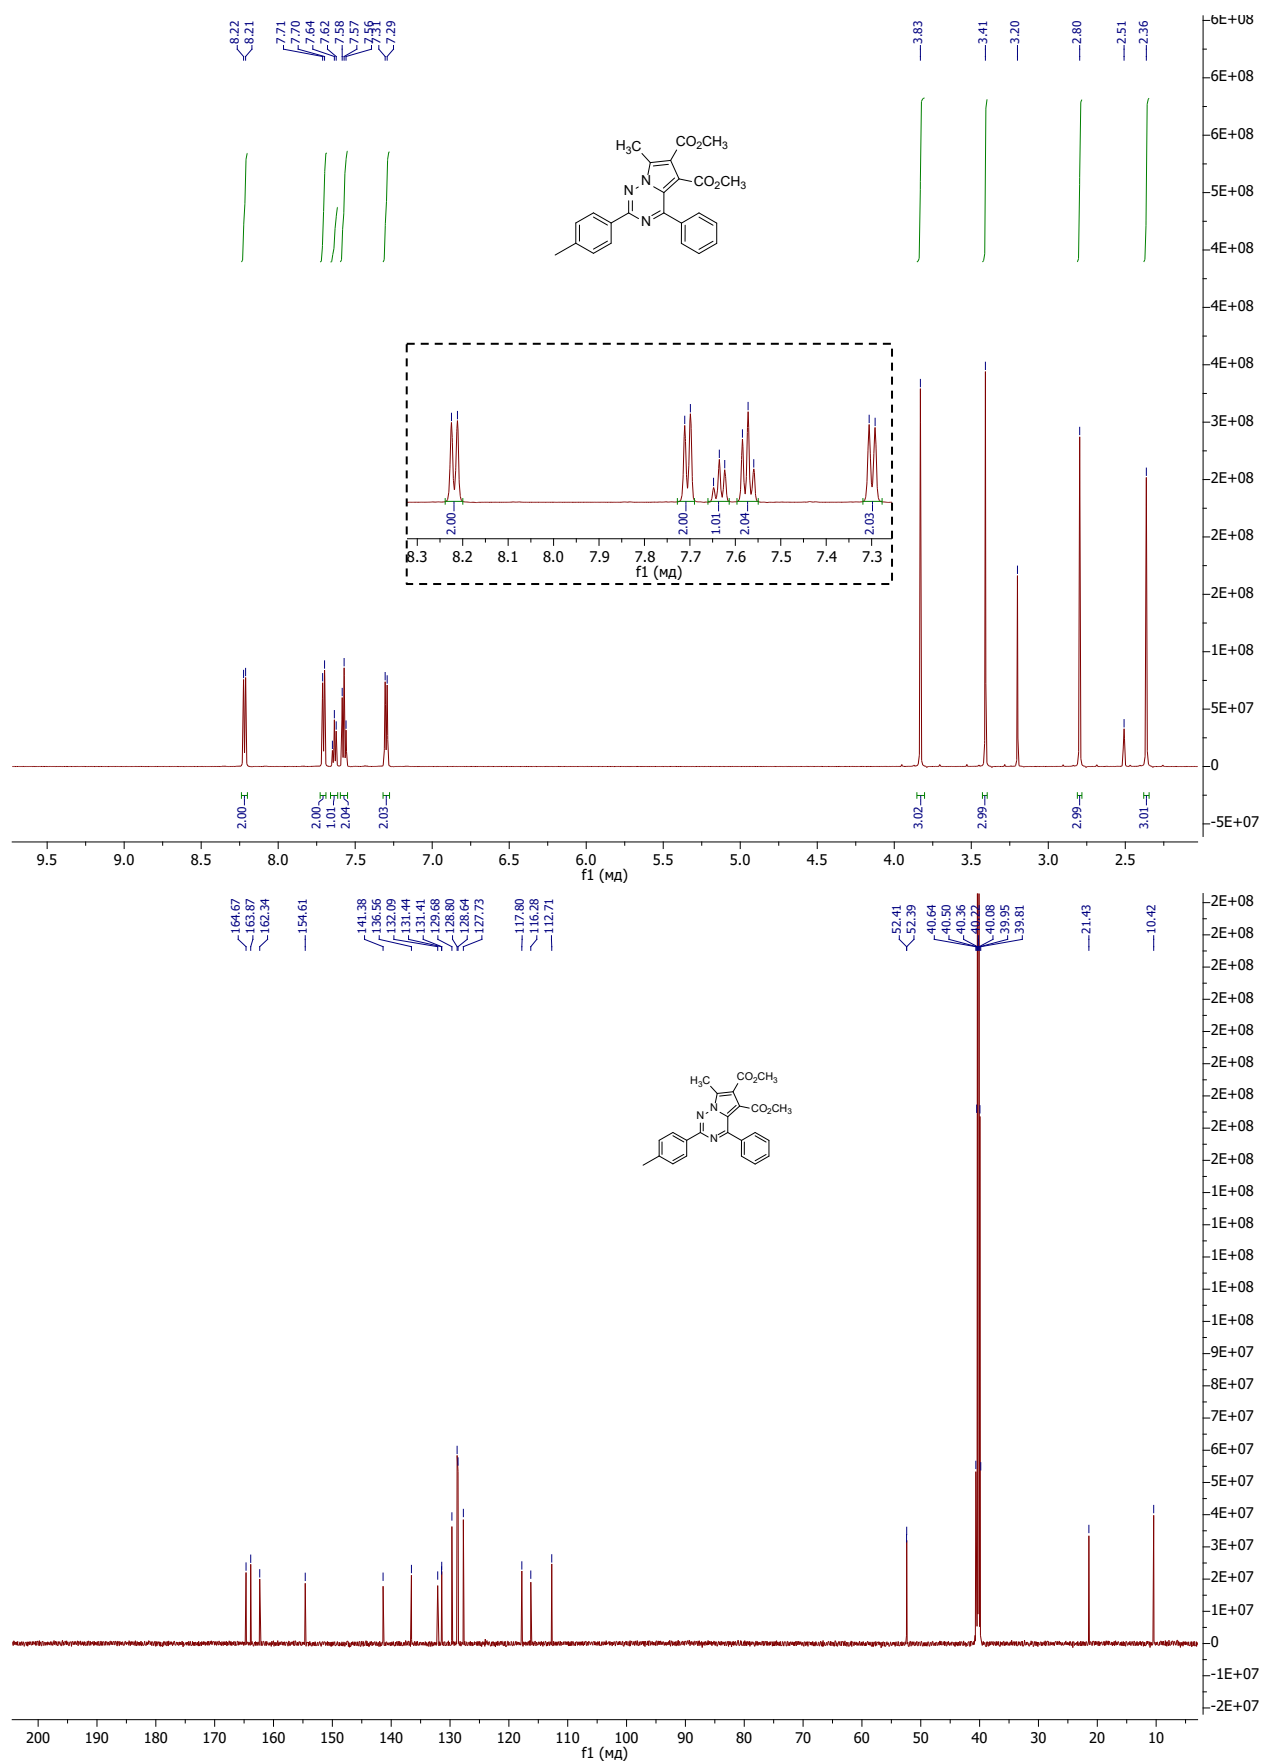

**Figure S29.** <sup>1</sup>H NMR (600 MHz, DMSO-*d*<sub>6</sub>, t = 60 °C) and <sup>13</sup>C NMR (151 MHz, DMSO-*d*<sub>6</sub>, t = 60 °C) spectra of **15a**

**Spectra of compounds**  
**Dimethyl 4-(4-bromophenyl)-7-methyl-2-*p*-tolylpyrrolo[2,1-*f*][1,2,4]triazine-5,6-dicarboxylate (**15b**)**

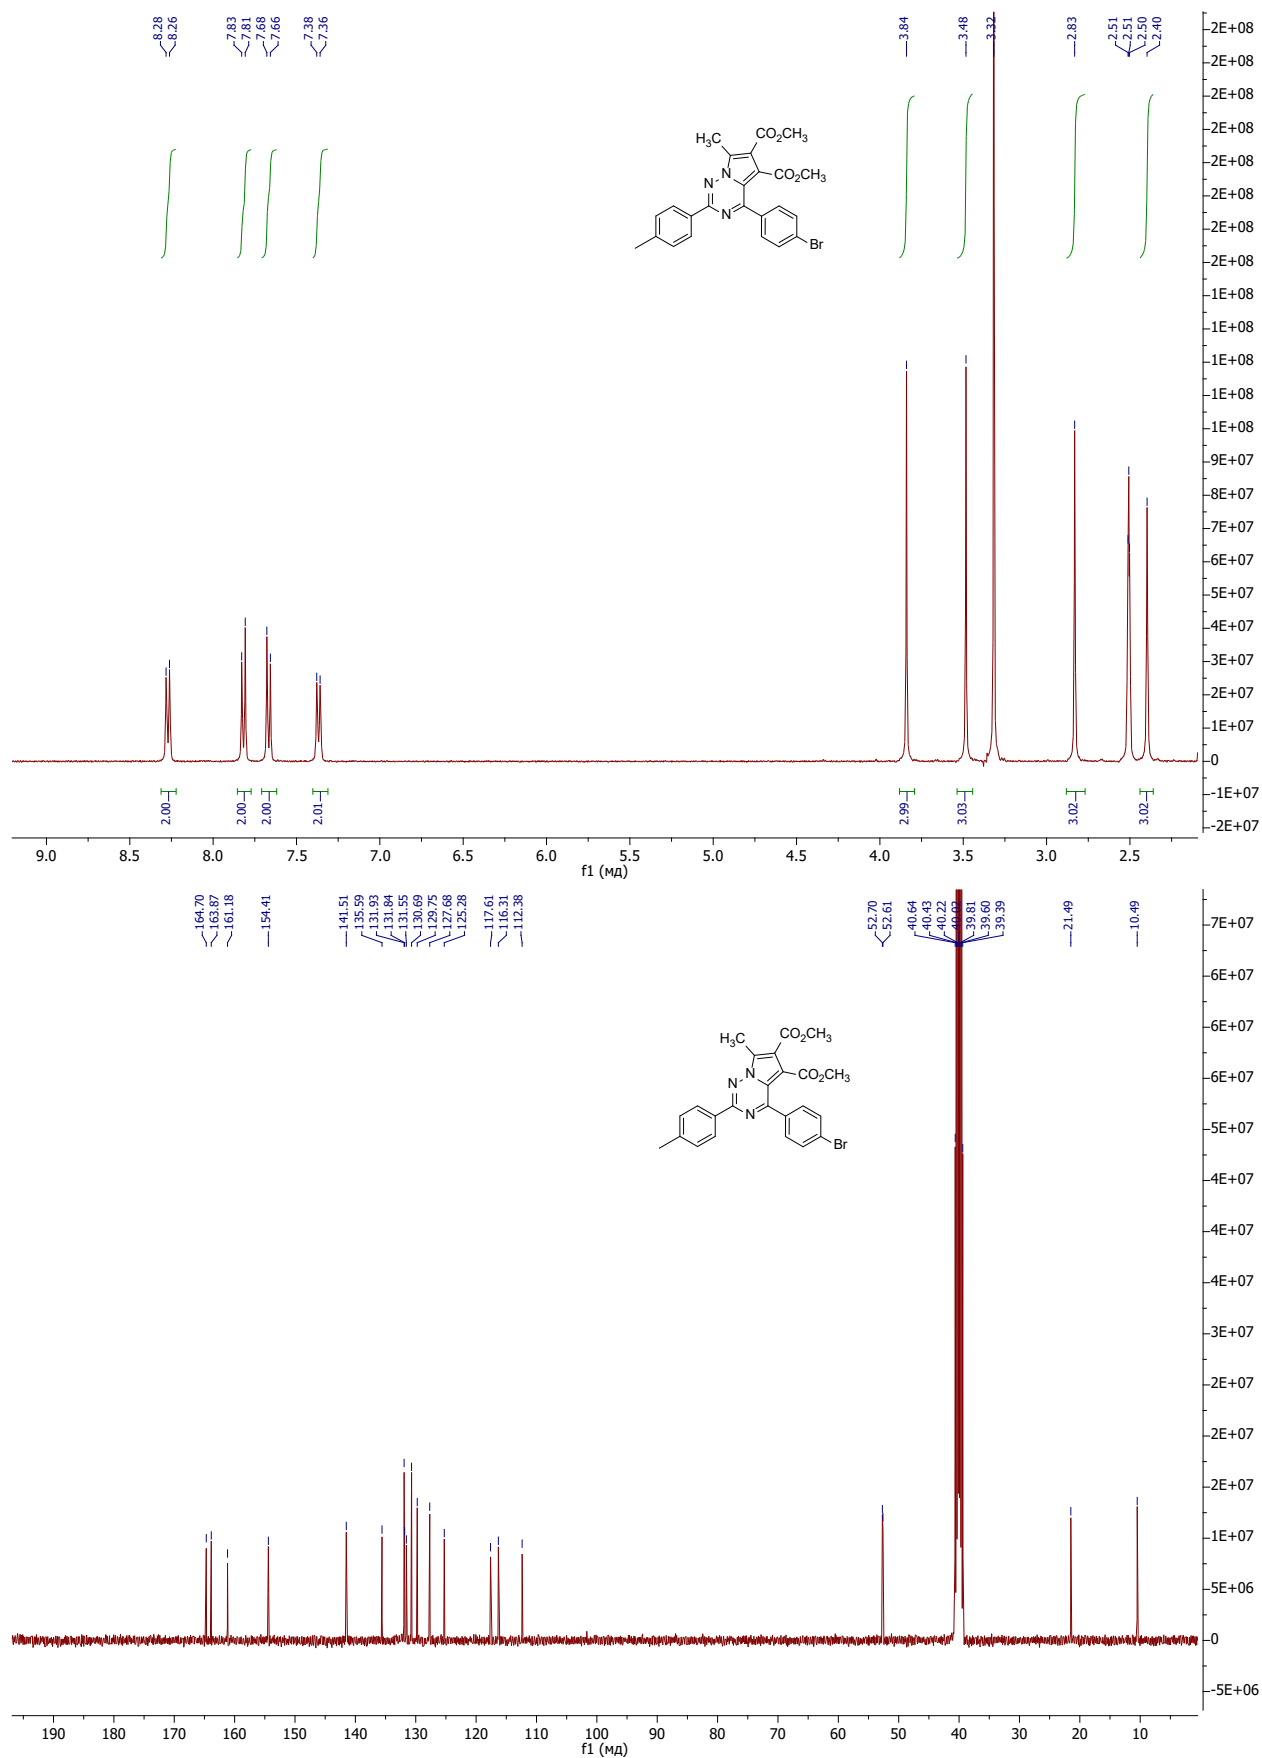

**Figure S30.** <sup>1</sup>H NMR (400 MHz, DMSO-*d*<sub>6</sub>) and <sup>13</sup>C NMR (101 MHz, DMSO-*d*<sub>6</sub>) spectra of **15b**

**Spectra of compounds**  
**Dimethyl 4-(4-chlorophenyl)-7-methyl-2-*p*-tolylpyrrolo[2,1-*f*][1,2,4]triazine-5,6-dicarboxylate (**15c**)**

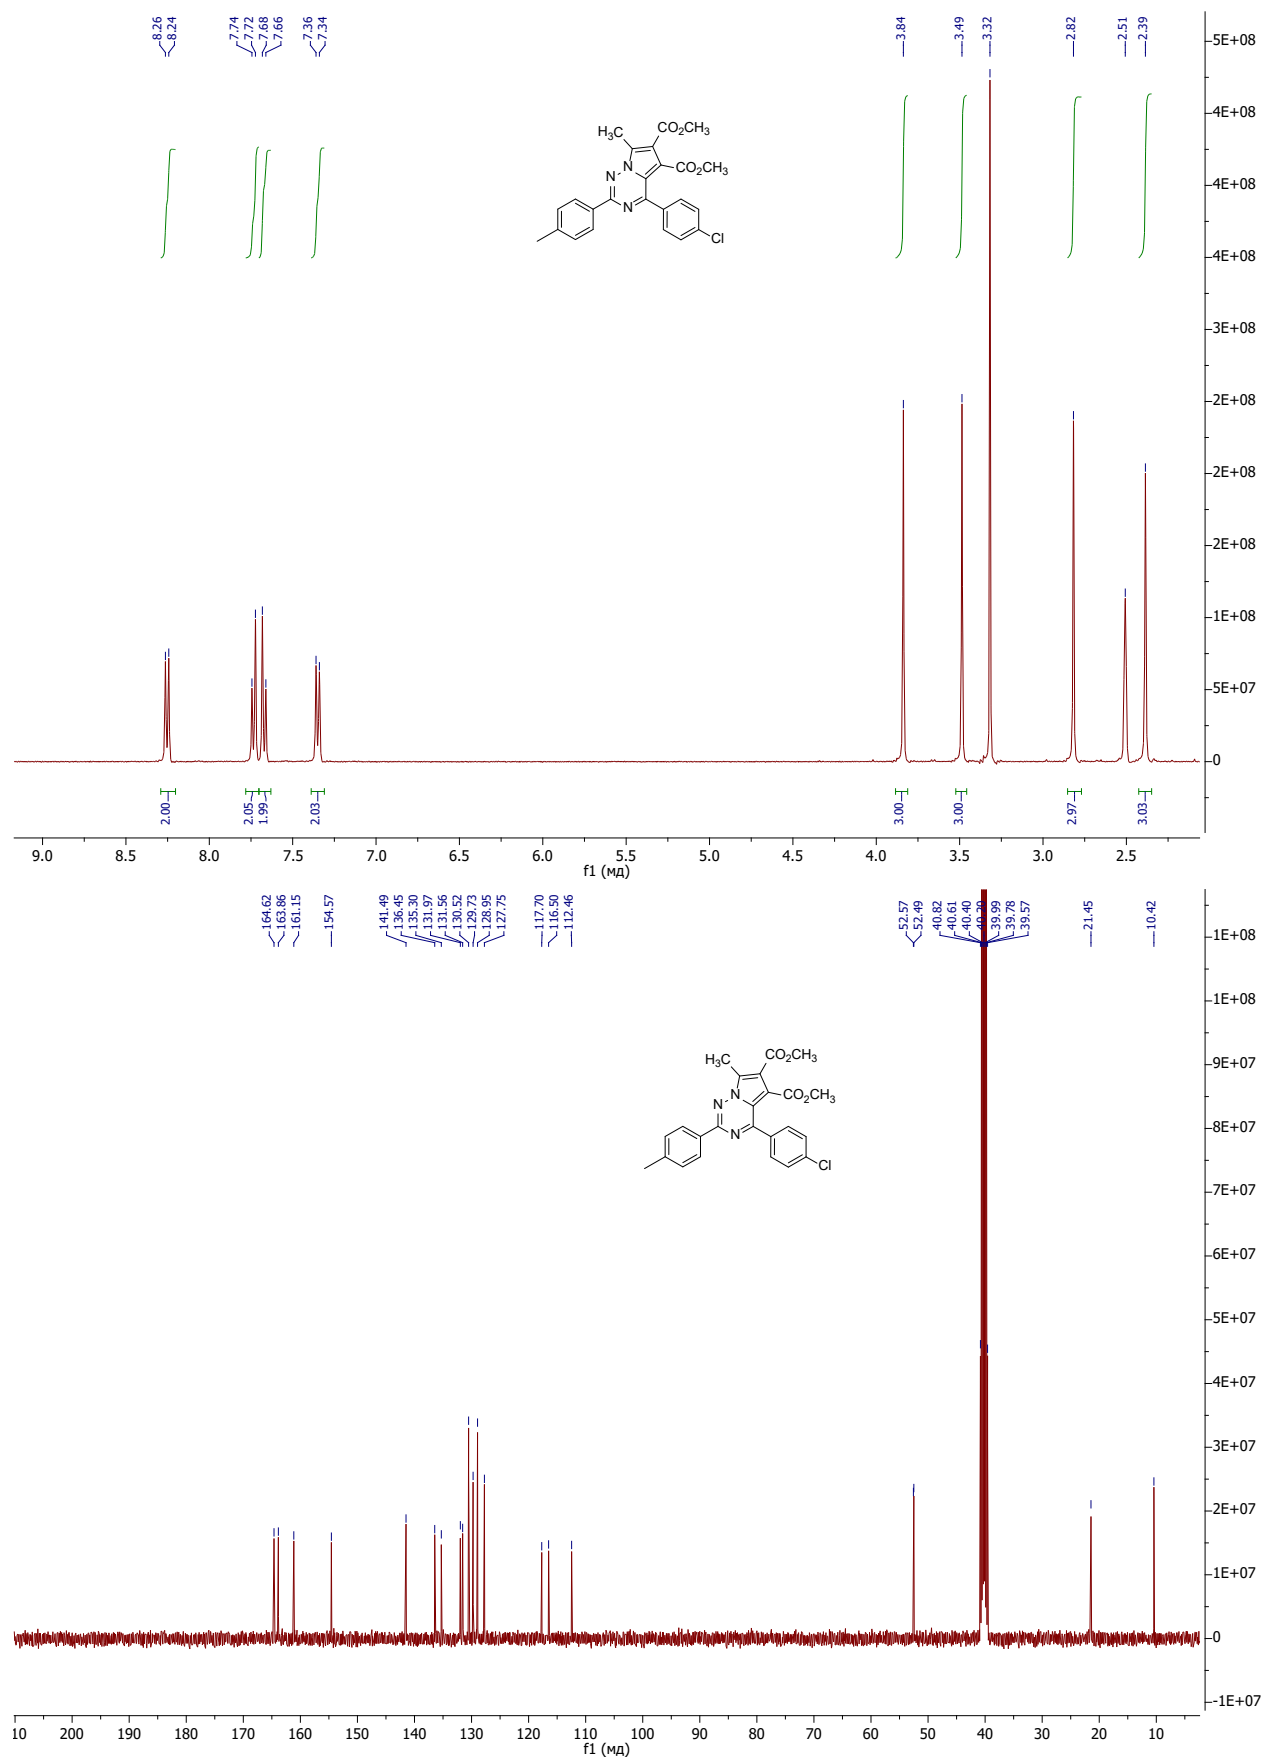

**Figure S31.** <sup>1</sup>H NMR (400 MHz, DMSO-*d*<sub>6</sub>) and <sup>13</sup>C NMR (101 MHz, DMSO-*d*<sub>6</sub>, *t* = 50 °C) spectra of **15c**

**Spectra of compounds**  
**Dimethyl 4-(3,4-dimethylphenyl)-7-methyl-2-*p*-tolyl-  
pyrrolo[2,1-*f*][1,2,4]triazine-5,6-dicarboxylate (15e)**

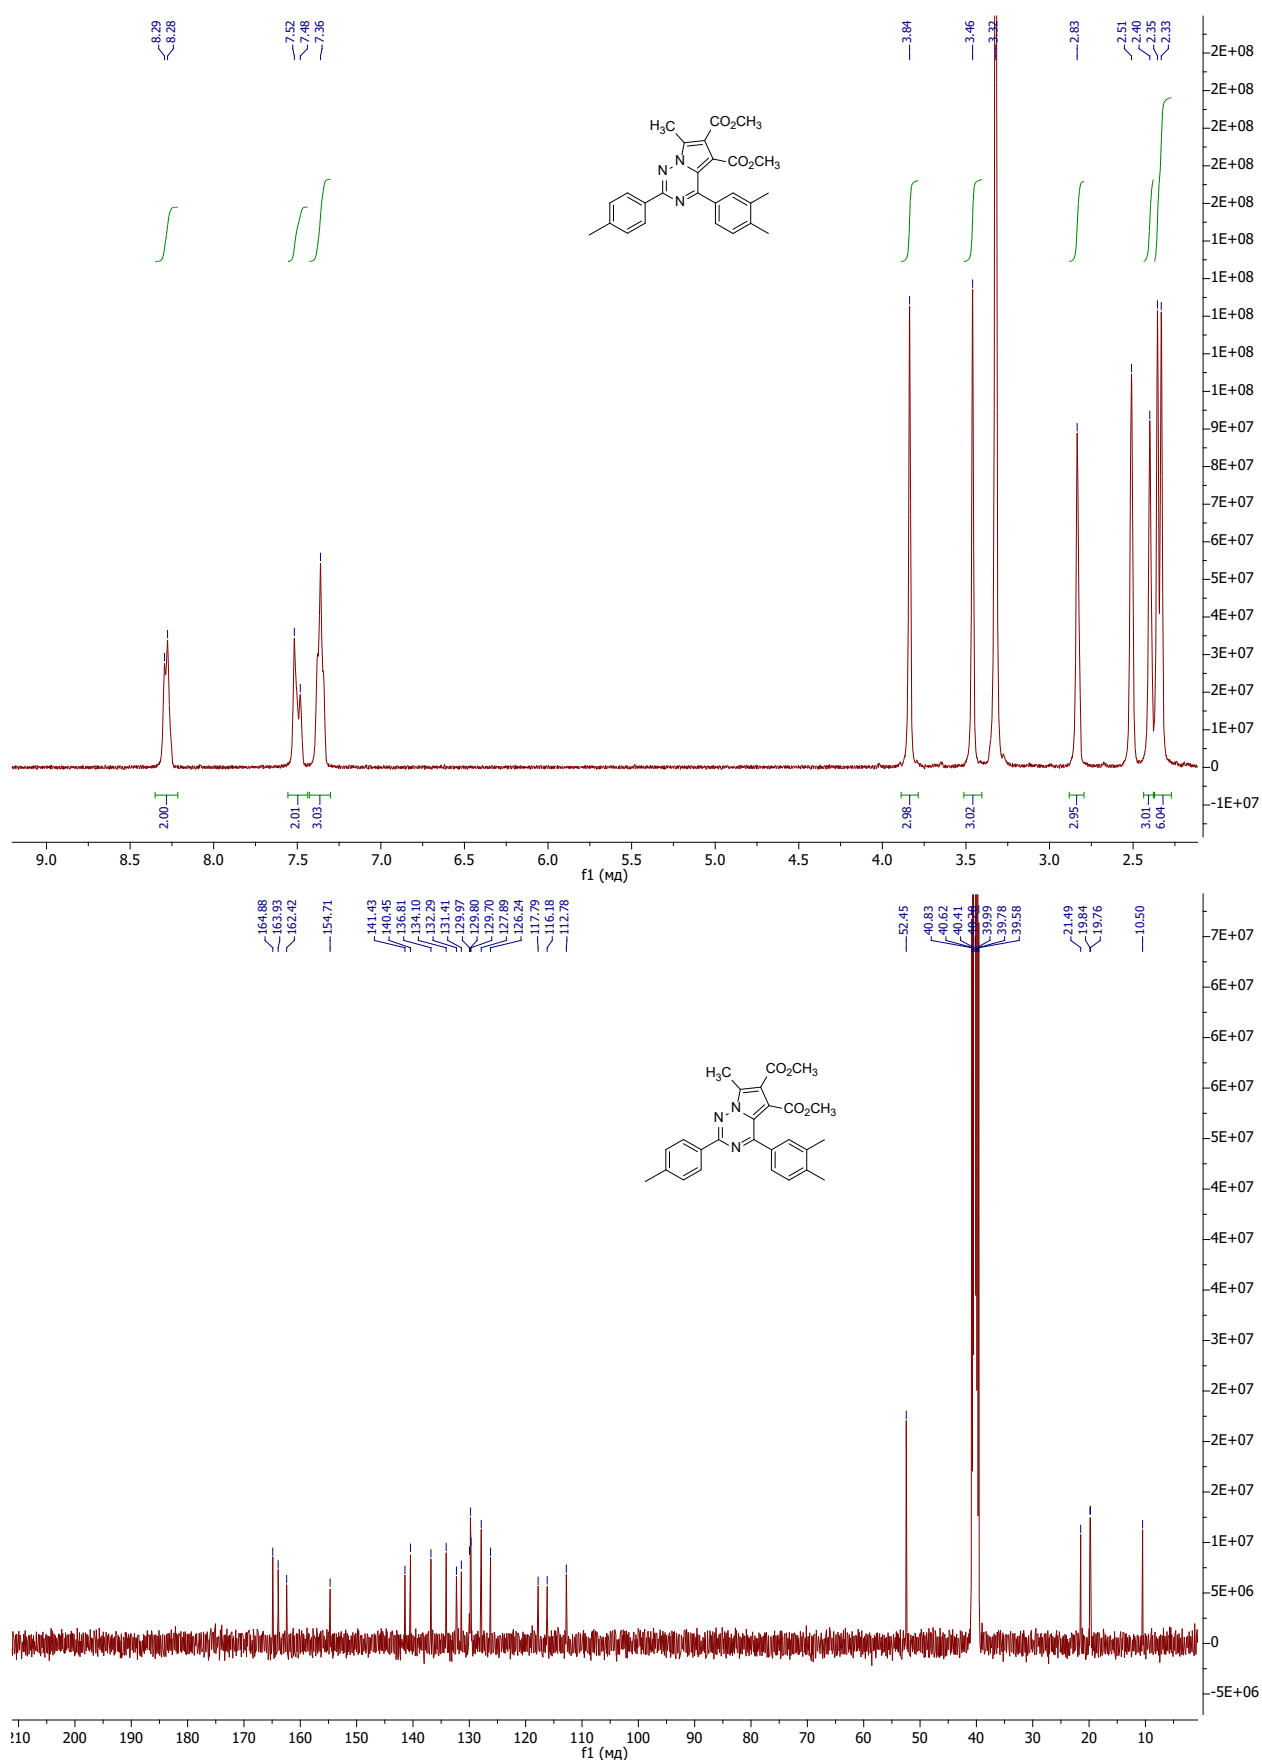

**Figure S32.** <sup>1</sup>H NMR (400 MHz, DMSO-*d*<sub>6</sub>) and <sup>13</sup>C NMR (101 MHz, DMSO-*d*<sub>6</sub>, t = 50 °C) spectra of **15e**

**Spectra of compounds**  
**Dimethyl 4-(4-methoxyphenyl)-7-methyl-2-*p*-tolylpyrrolo[2,1-*f*][1,2,4]triazine-5,6-dicarboxylate (**15f**)**

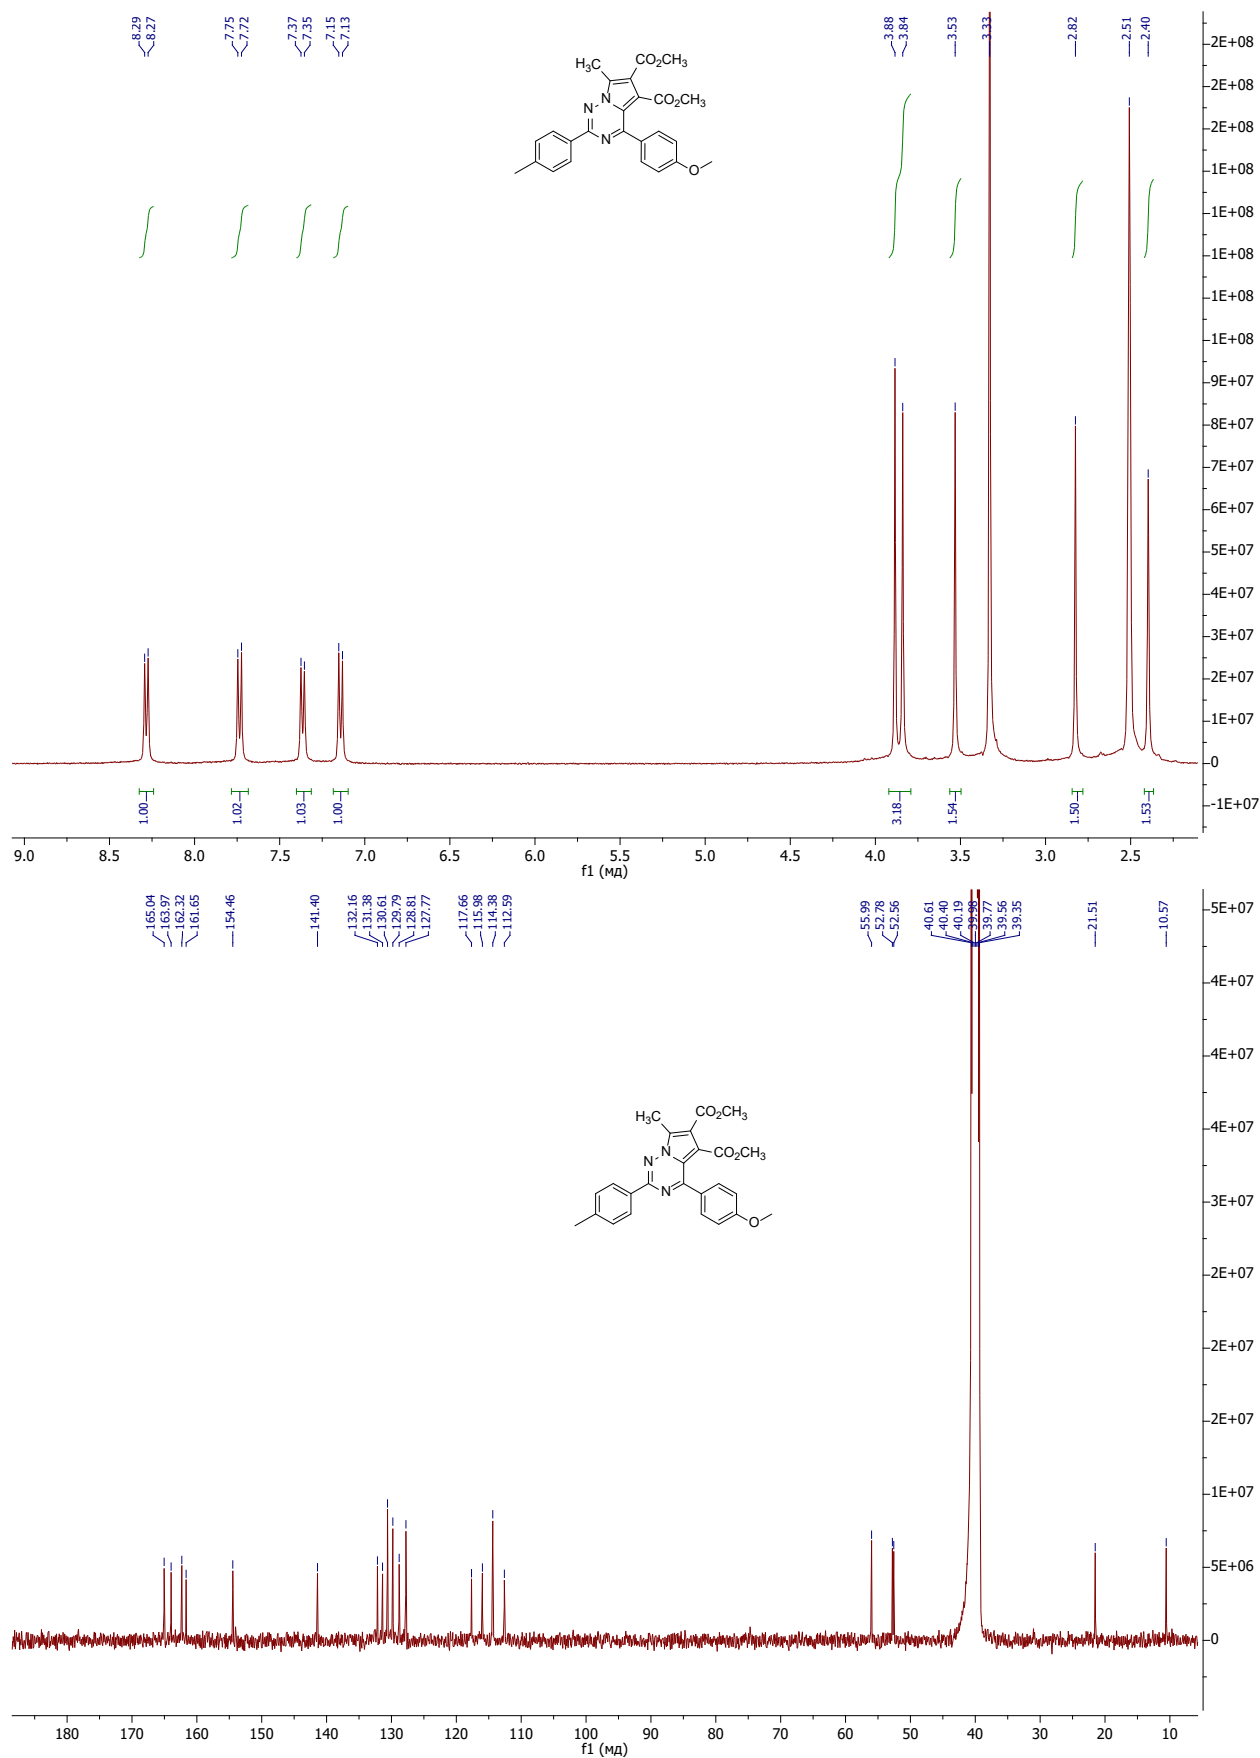

**Figure S33.** <sup>1</sup>H NMR (400 MHz, DMSO-*d*<sub>6</sub>) and <sup>13</sup>C NMR (101 MHz, DMSO-*d*<sub>6</sub>) spectra of **15f**



# Spectra of compounds

## Dimethyl 7-methyl-4-(naphthalen-2-yl)-2-*p*-tolylpyrrolo[2,1-*f*][1,2,4]triazine-5,6-dicarboxylate (**15g**)

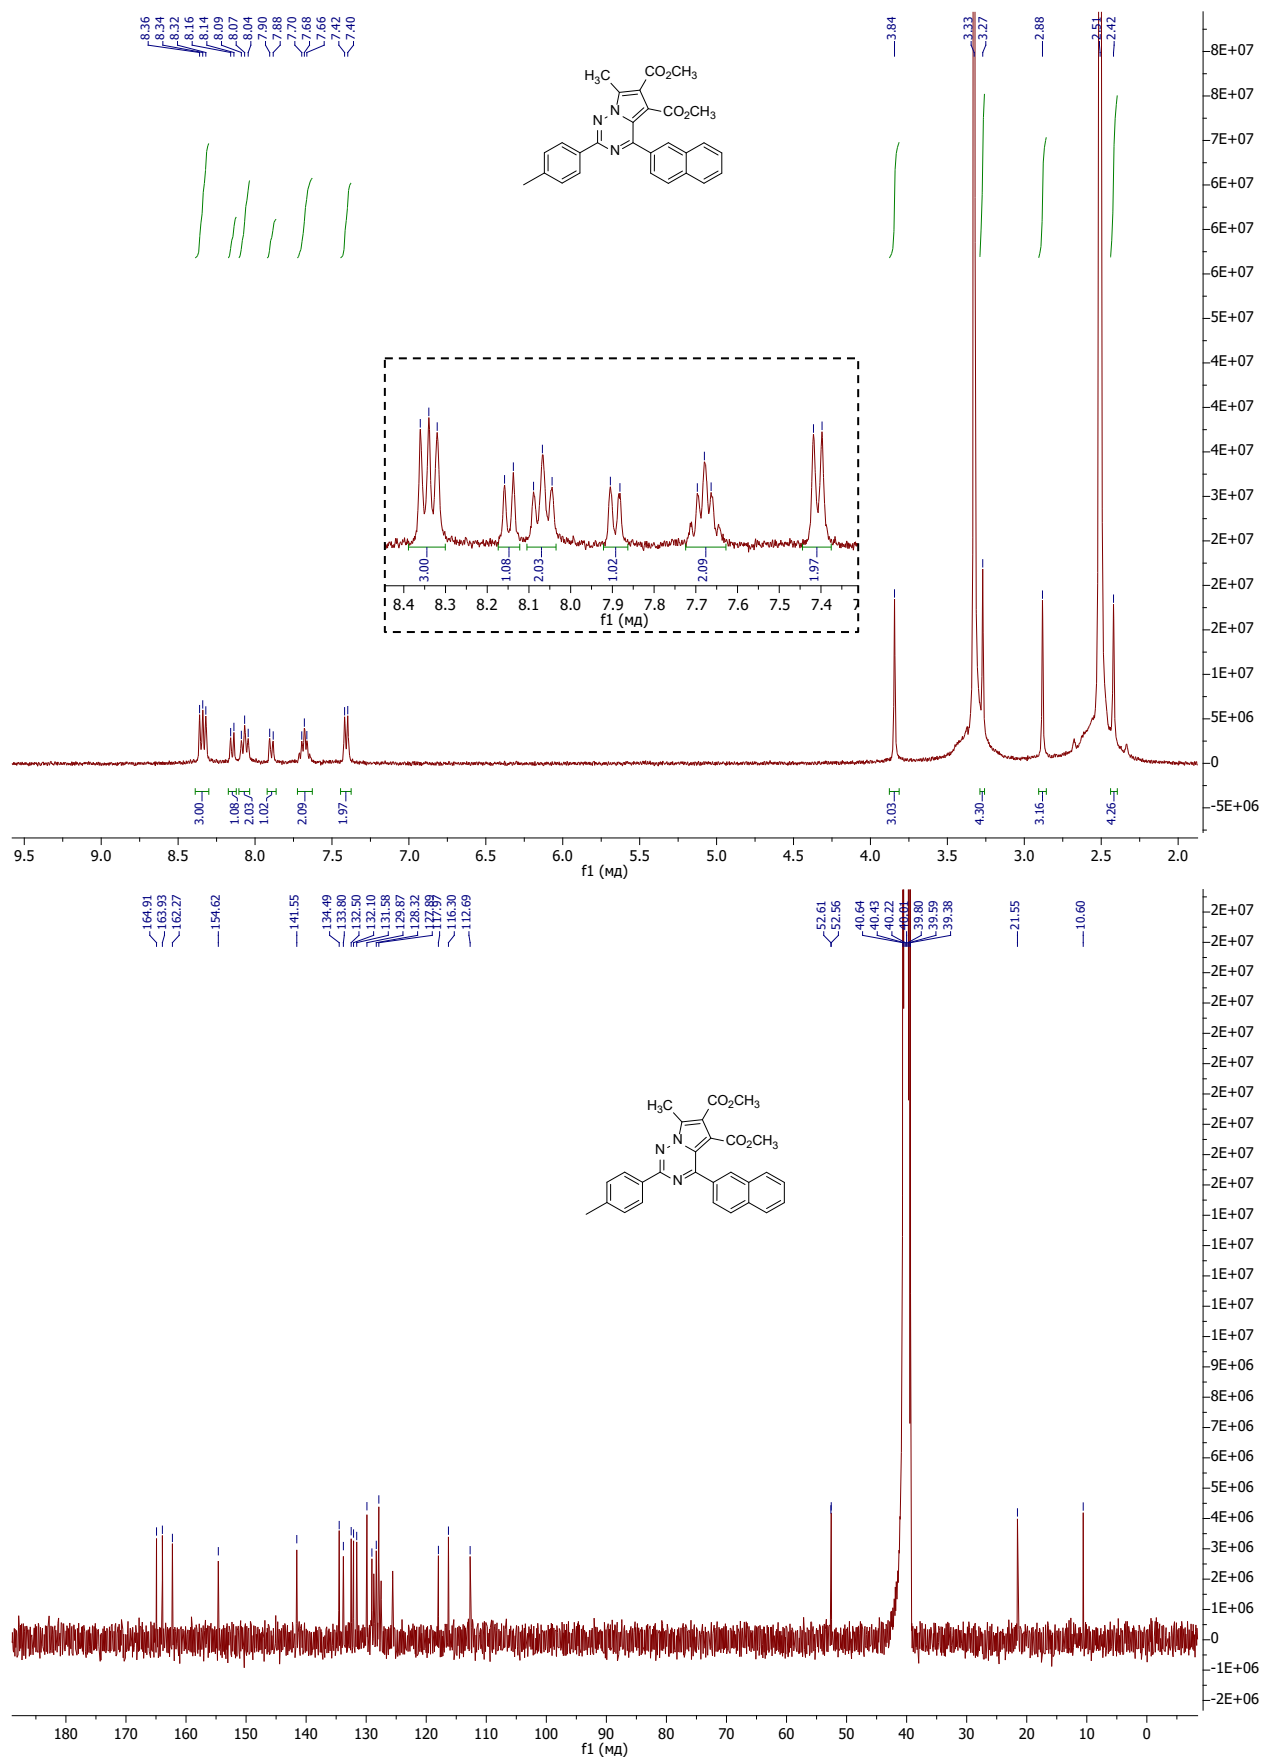

**Figure S34.** <sup>1</sup>H NMR (400 MHz, DMSO-*d*<sub>6</sub>) and <sup>13</sup>C NMR (101 MHz, DMSO-*d*<sub>6</sub>) spectra of **15g**

**Spectra of compounds**  
**Dimethyl 7-methyl-4-phenyl-2-(thiophen-2-yl)pyrrolo[2,1-f][1,2,4]triazine-5,6-dicarboxylate (16a)**

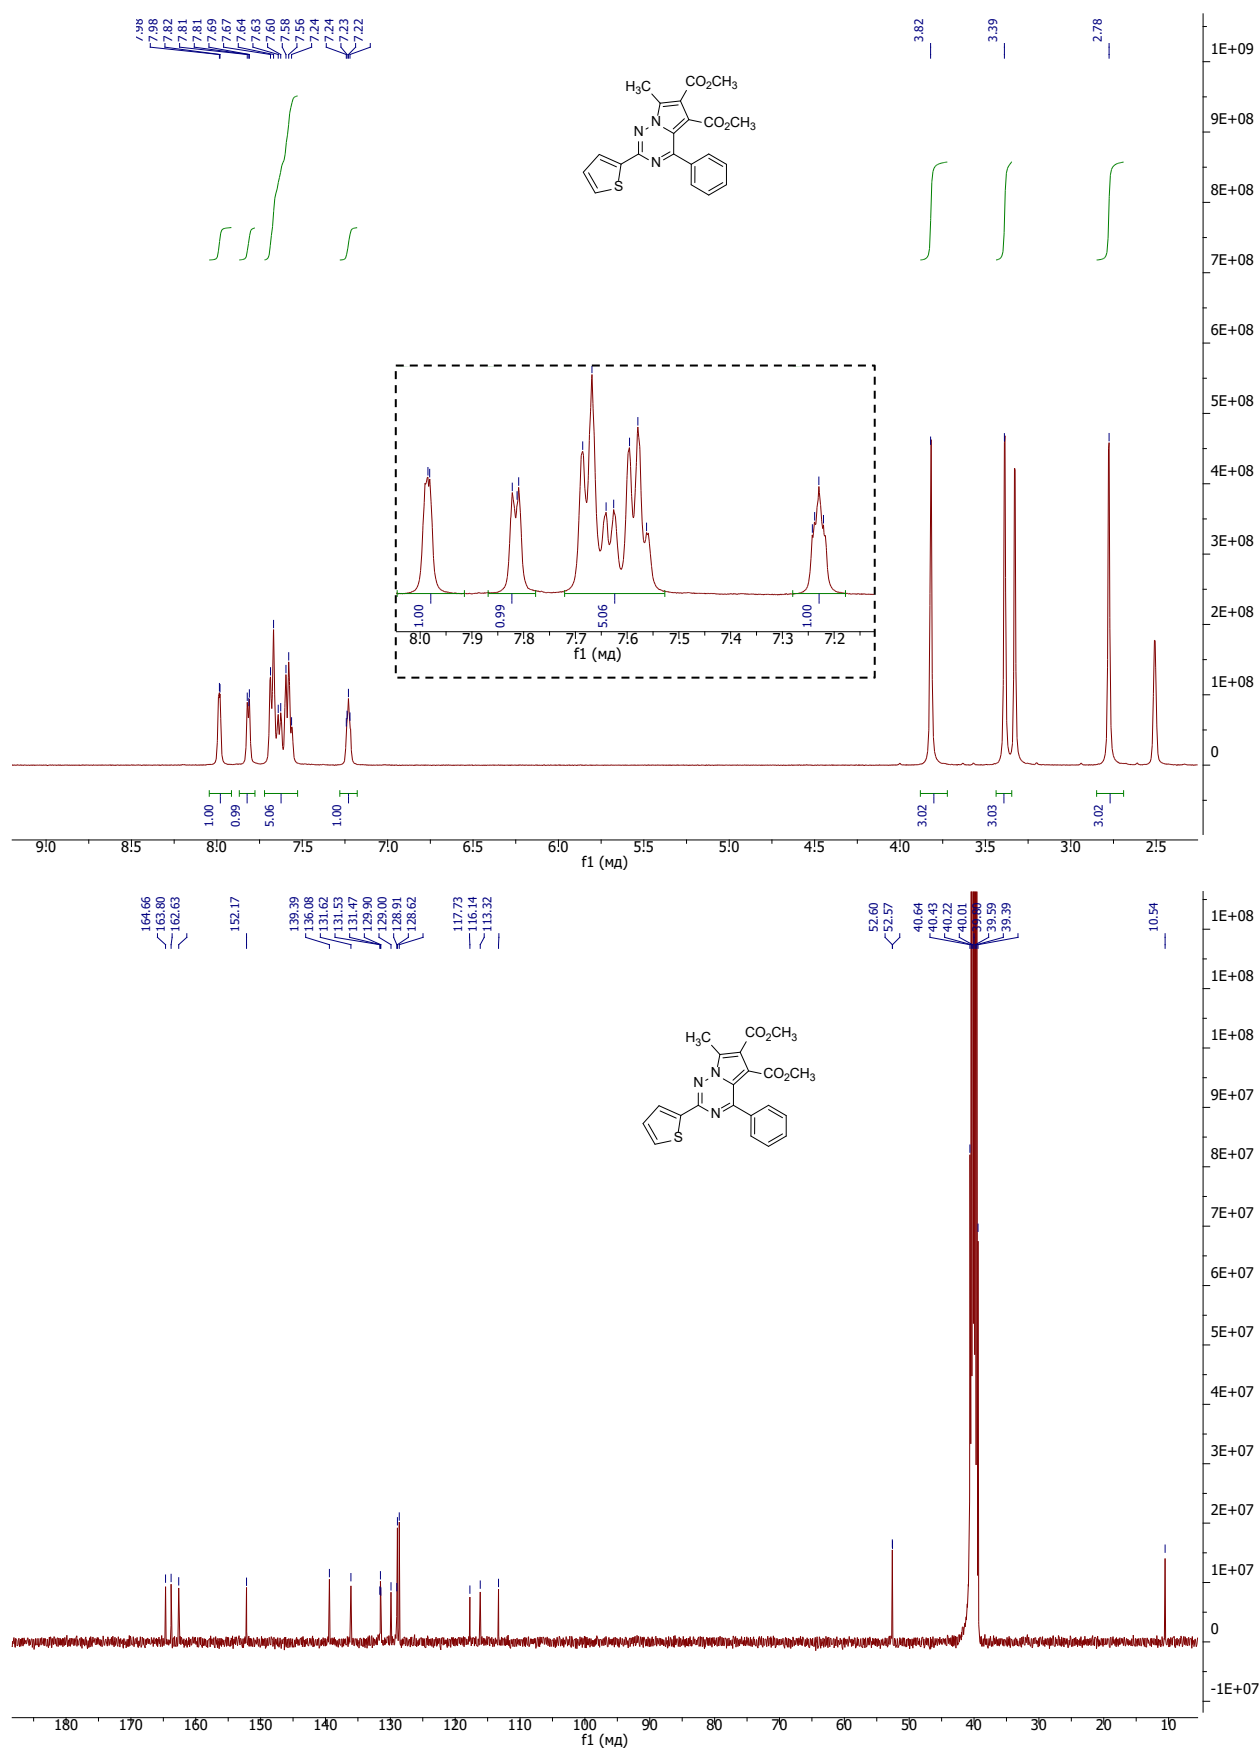

**Figure S35.** <sup>1</sup>H NMR (400 MHz, DMSO-*d*<sub>6</sub>) and <sup>13</sup>C NMR (101 MHz, DMSO-*d*<sub>6</sub>) spectra of **16a**

**Spectra of compounds**  
**Dimethyl 4-(4-methoxyphenyl)-7-methyl-2-(thiophen-2-yl)-**  
**pyrrolo[2,1-f][1,2,4]triazine-5,6-dicarboxylate (16f)**

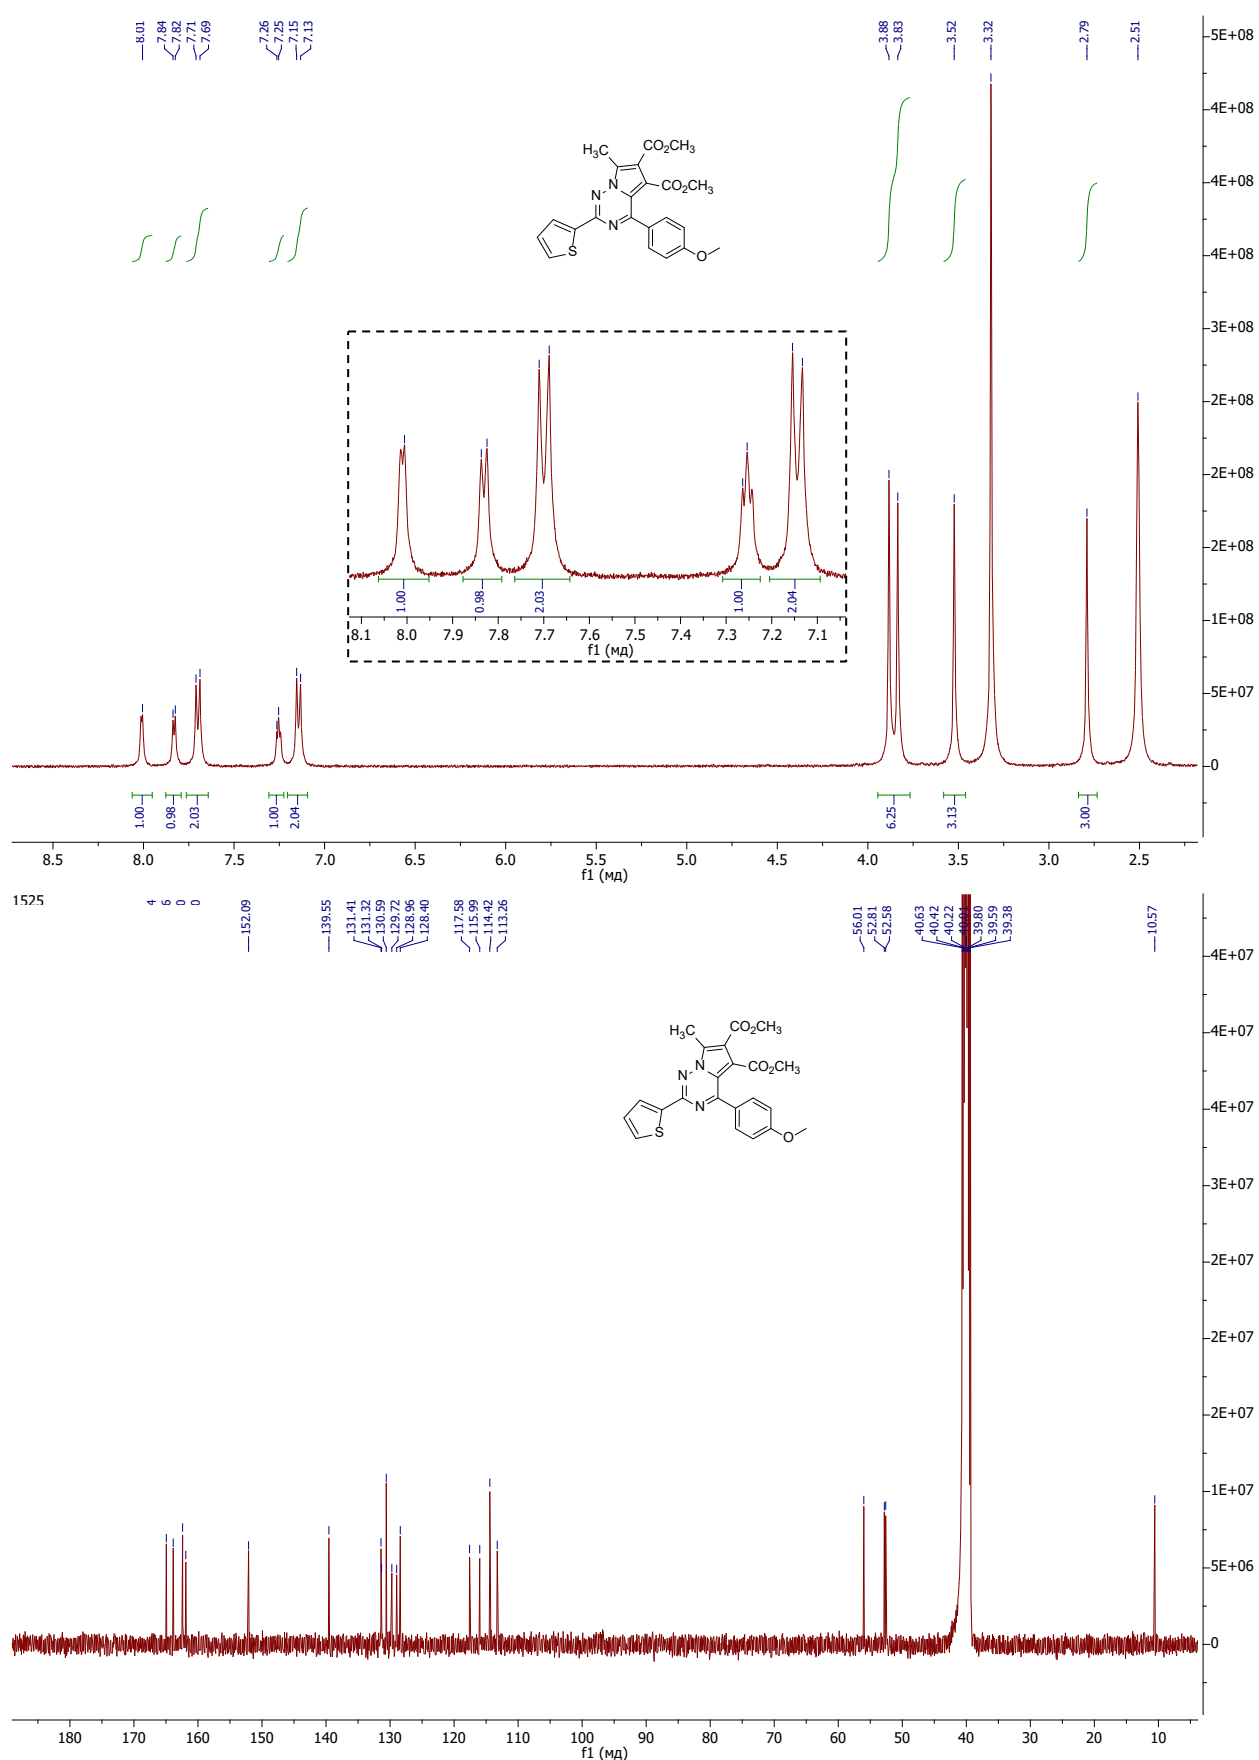

**Figure S36.** <sup>1</sup>H NMR (400 MHz, DMSO-*d*<sub>6</sub>) and <sup>13</sup>C NMR (101 MHz, DMSO-*d*<sub>6</sub>) spectra of **16f**

**Spectra of compounds**  
**Dimethyl 7-methyl-4-(naphthalen-2-yl)-2-(thiophen-2-yl)-**  
**pyrrolo[2,1-f][1,2,4]triazine-5,6-dicarboxylate (16g)**

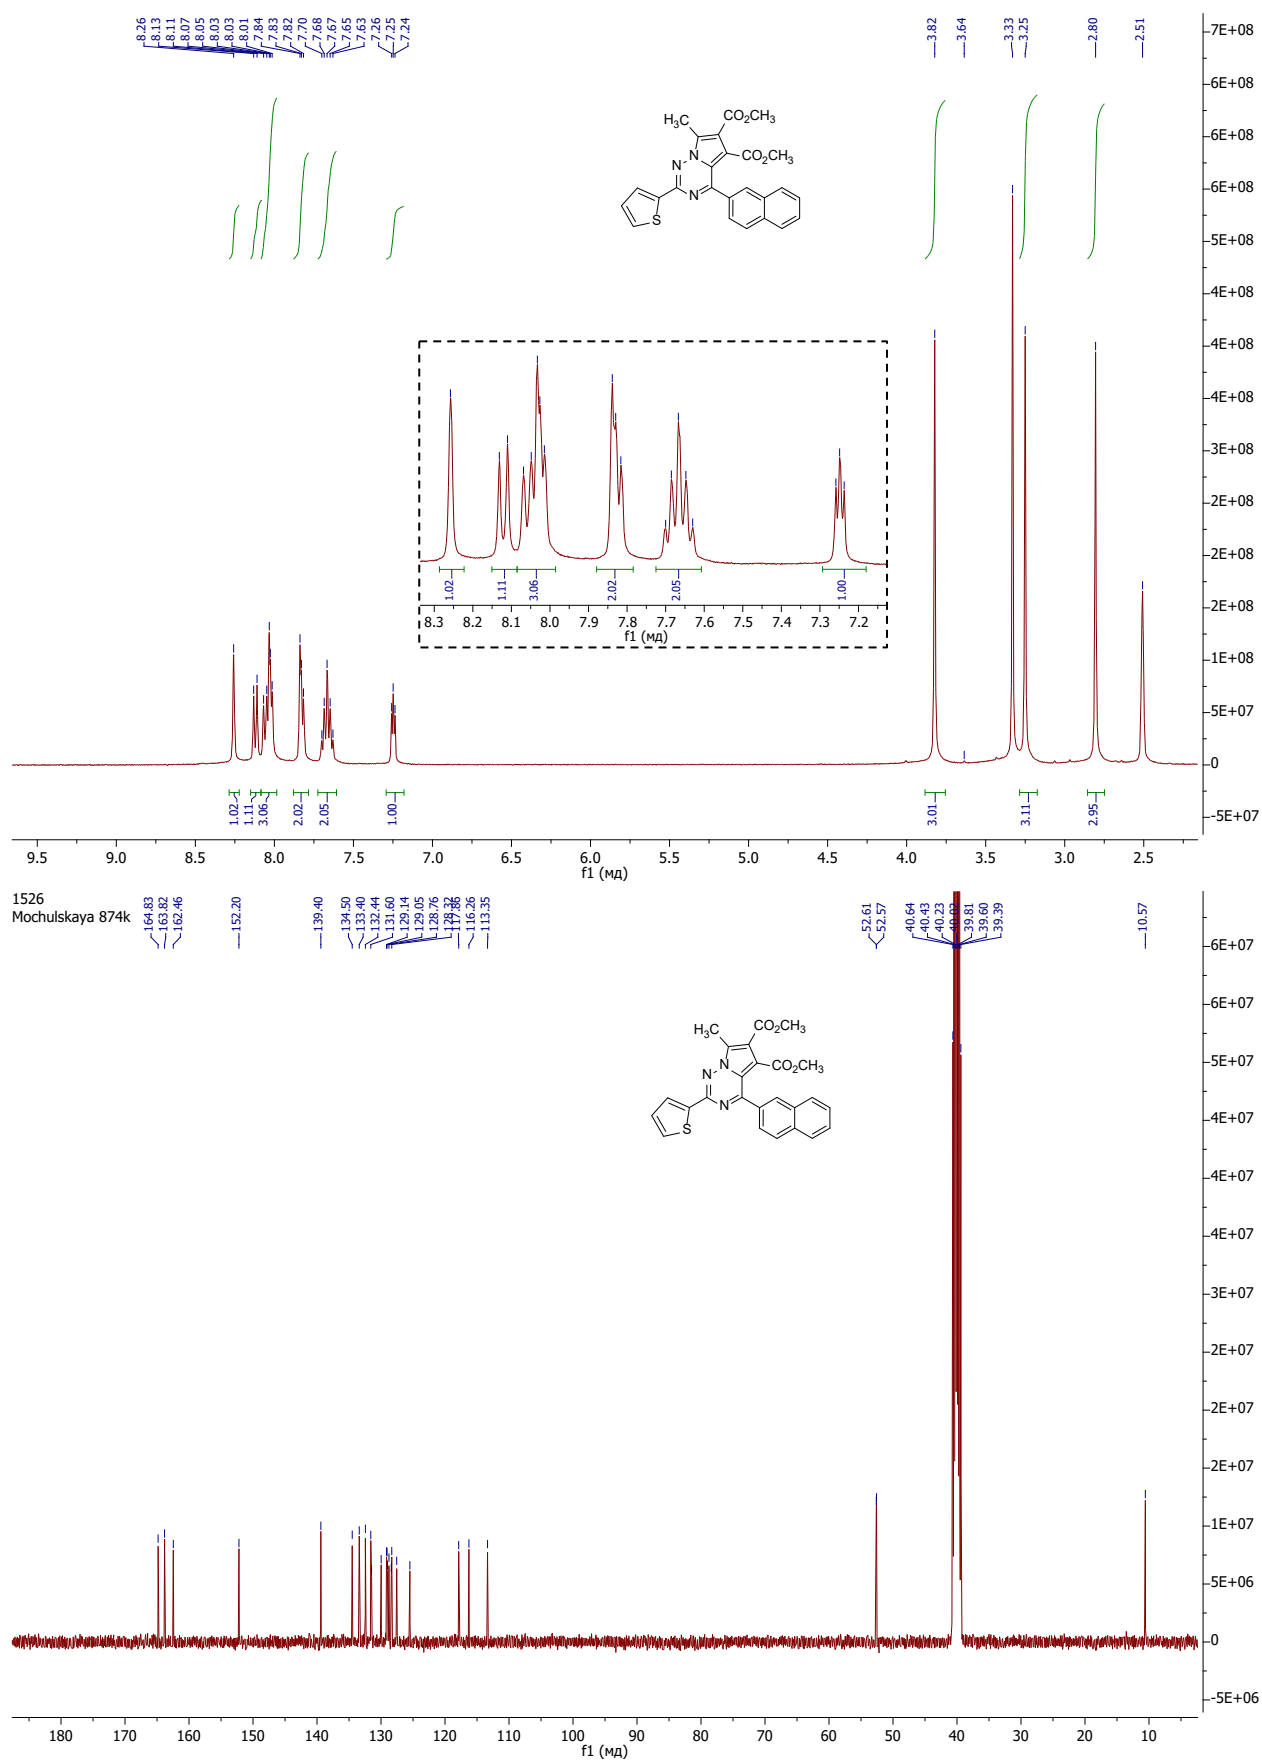

**Figure S37.** <sup>1</sup>H NMR (400 MHz, DMSO-*d*<sub>6</sub>) and <sup>13</sup>C NMR (101 MHz, DMSO-*d*<sub>6</sub>) spectra of **16g**

**Spectra of compounds**  
**Dimethyl 7-methyl-2,4-di(thiophen-2-yl)pyrrolo[2,1-f][1,2,4]triazine-5,6-dicarboxylate (16h)**

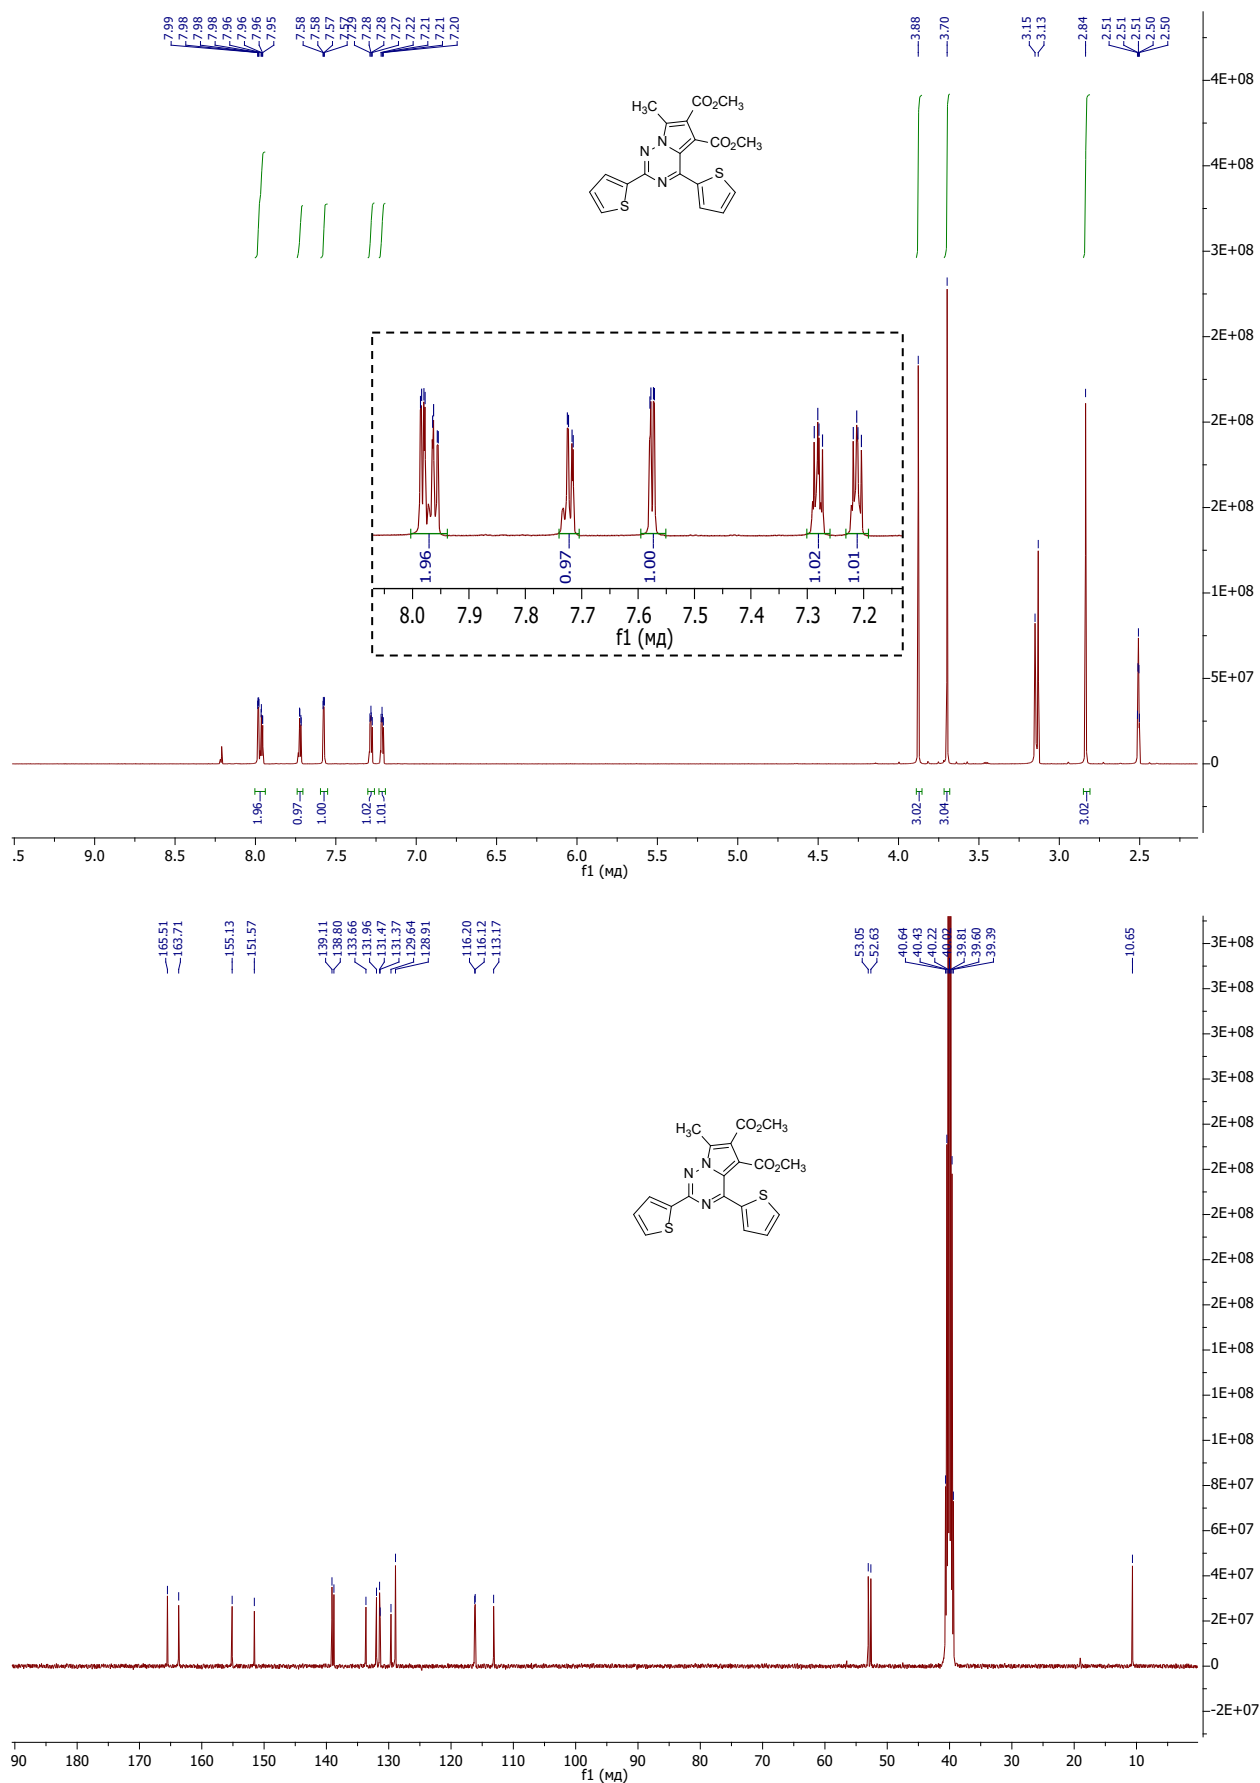

**Figure S38.** <sup>1</sup>H NMR (600 MHz, DMSO-*d*<sub>6</sub>) and <sup>13</sup>C NMR (101 MHz, DMSO-*d*<sub>6</sub>) spectra of **16h**

**Spectra of compounds**  
**Dimethyl 2-(4-chlorophenyl)-7-methyl-4-phenylpyrrolo[2,1-f][1,2,4]triazine-5,6-dicarboxylate (17a)**

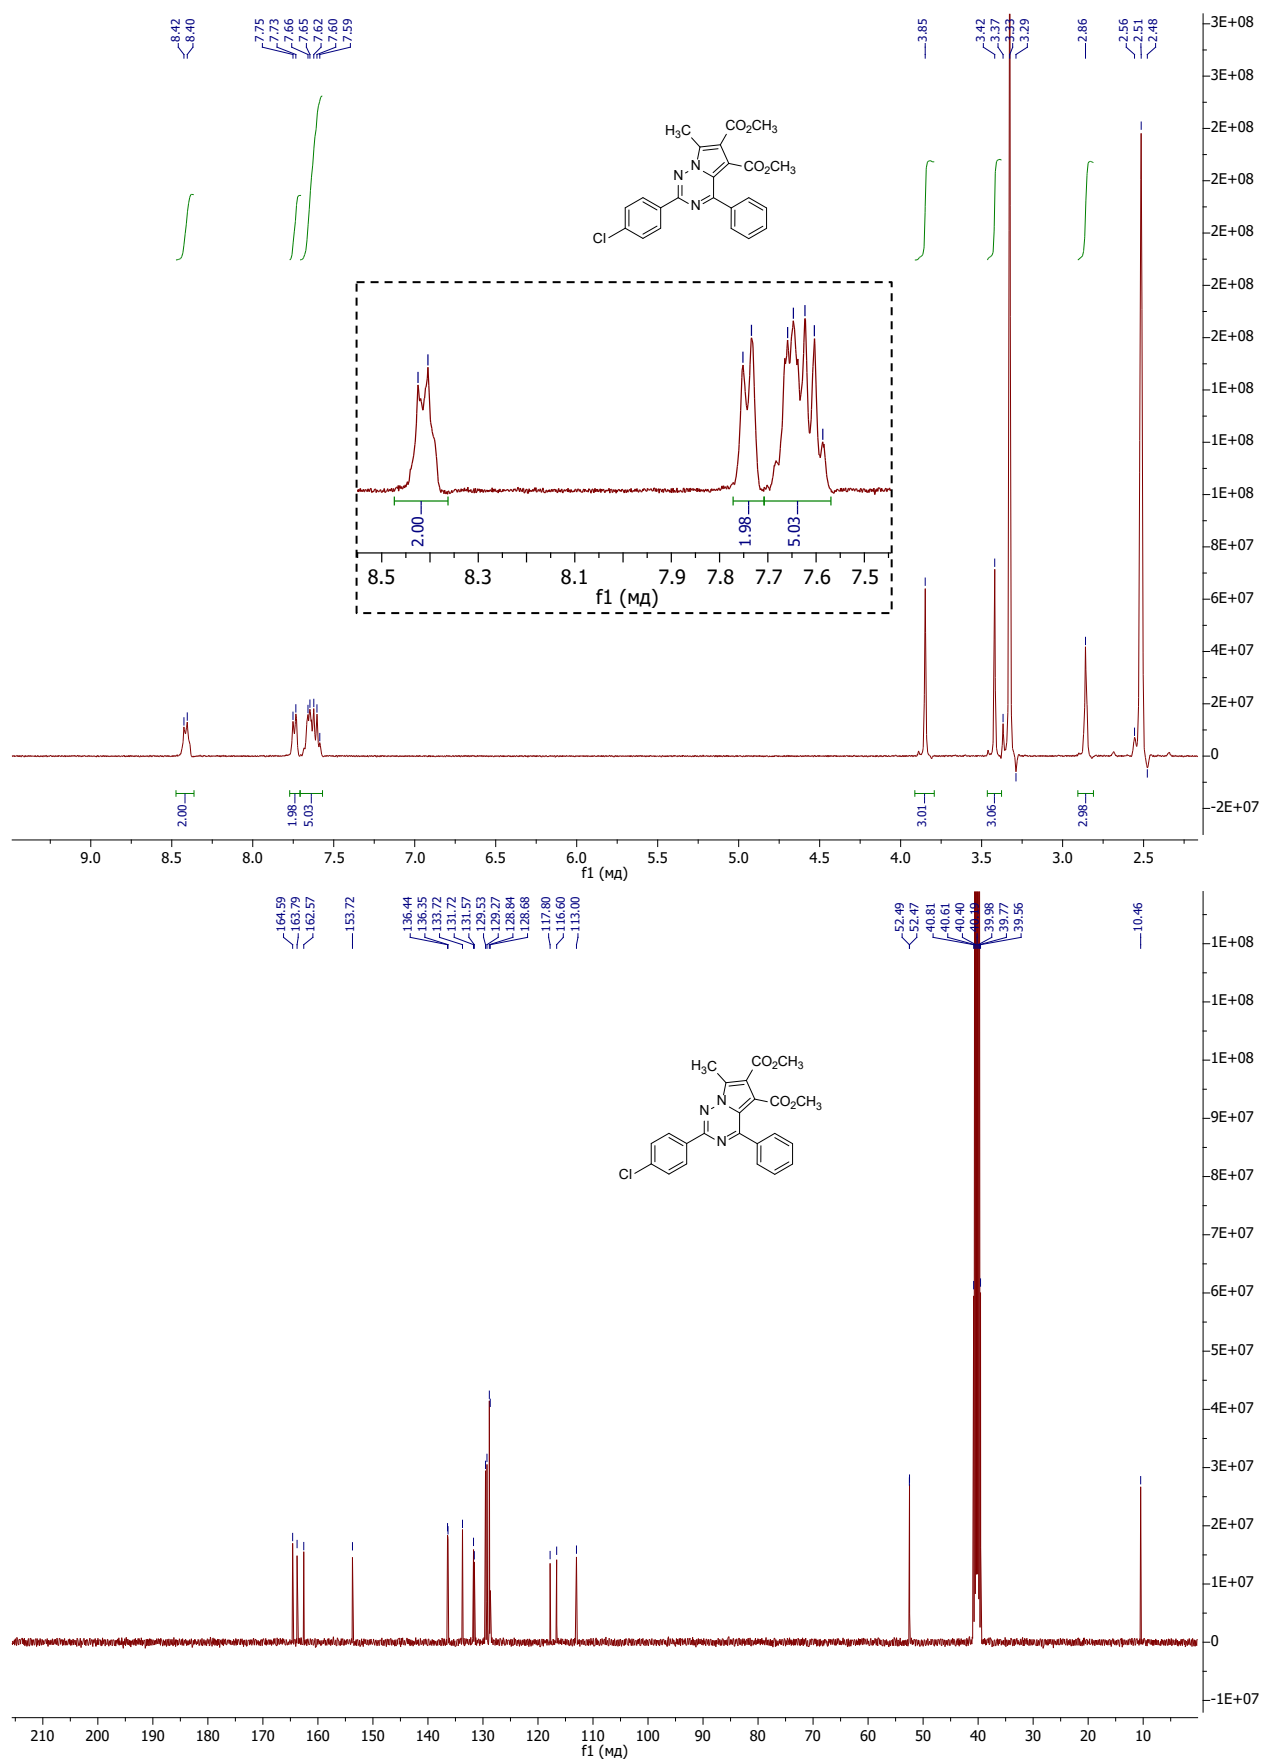

**Figure S39.** <sup>1</sup>H NMR (400 MHz, DMSO-*d*<sub>6</sub>) and <sup>13</sup>C NMR (101 MHz, DMSO-*d*<sub>6</sub>, t = 50 °C) spectra of **17a**
